# Supplementary material for: Intermolecular sequential [4 + 2]-cycloaddition–aromatization reaction of aryl-substituted allenes with DMAD affording phenanthrene and naphthalene derivatives
Source: Royal Society of Chemistry journal article supplement (doi:10.1039/b808767a), 2008-01-01

**Supporting Information**  
**for**  
**Intermolecular Sequential [4+2]-Cycloaddition-Aromatization**  
**Reaction of Aryl-Substituted Allenes with DMAD Affording**  
**Phenanthrene and Naphthalene Derivatives**

Xuefeng Jiang,<sup>[a]</sup> Wangqing Kong,<sup>[b]</sup> Jie Chen,<sup>[a]</sup> and Shengming Ma\*<sup>[a, b]</sup>

*<sup>a</sup> State Key Laboratory of Organometallic Chemistry, Shanghai Institute of Organic Chemistry, Chinese Academy of Sciences, 354 Fenglin Lu, 200032, Shanghai P. R.*

*China*

*<sup>b</sup> Laboratory of Molecular Synthesis and Recognition, Department of Chemistry, Zhejiang University, 310027 Hangzhou, Zhejiang, P. R. China*

[masm@mail.sioc.ac.cn](mailto:masm@mail.sioc.ac.cn)

**Index**

<sup>1</sup>H NMR and <sup>13</sup>C NMR spectra for compounds **2c-l** and **4**

S2

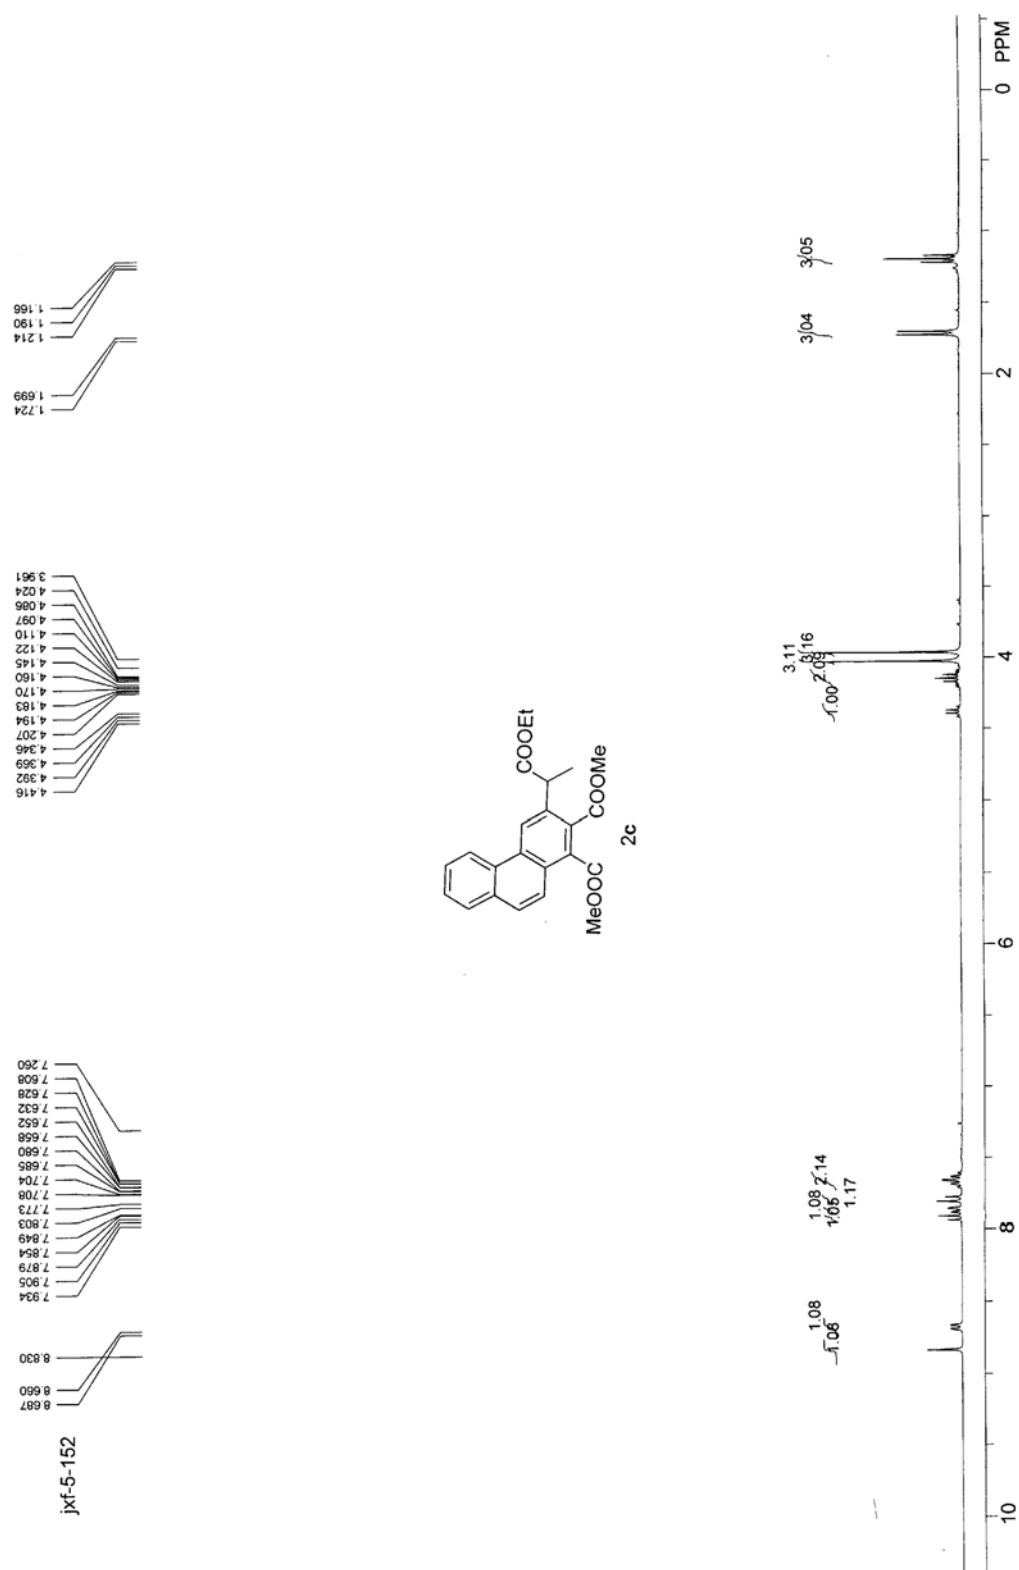

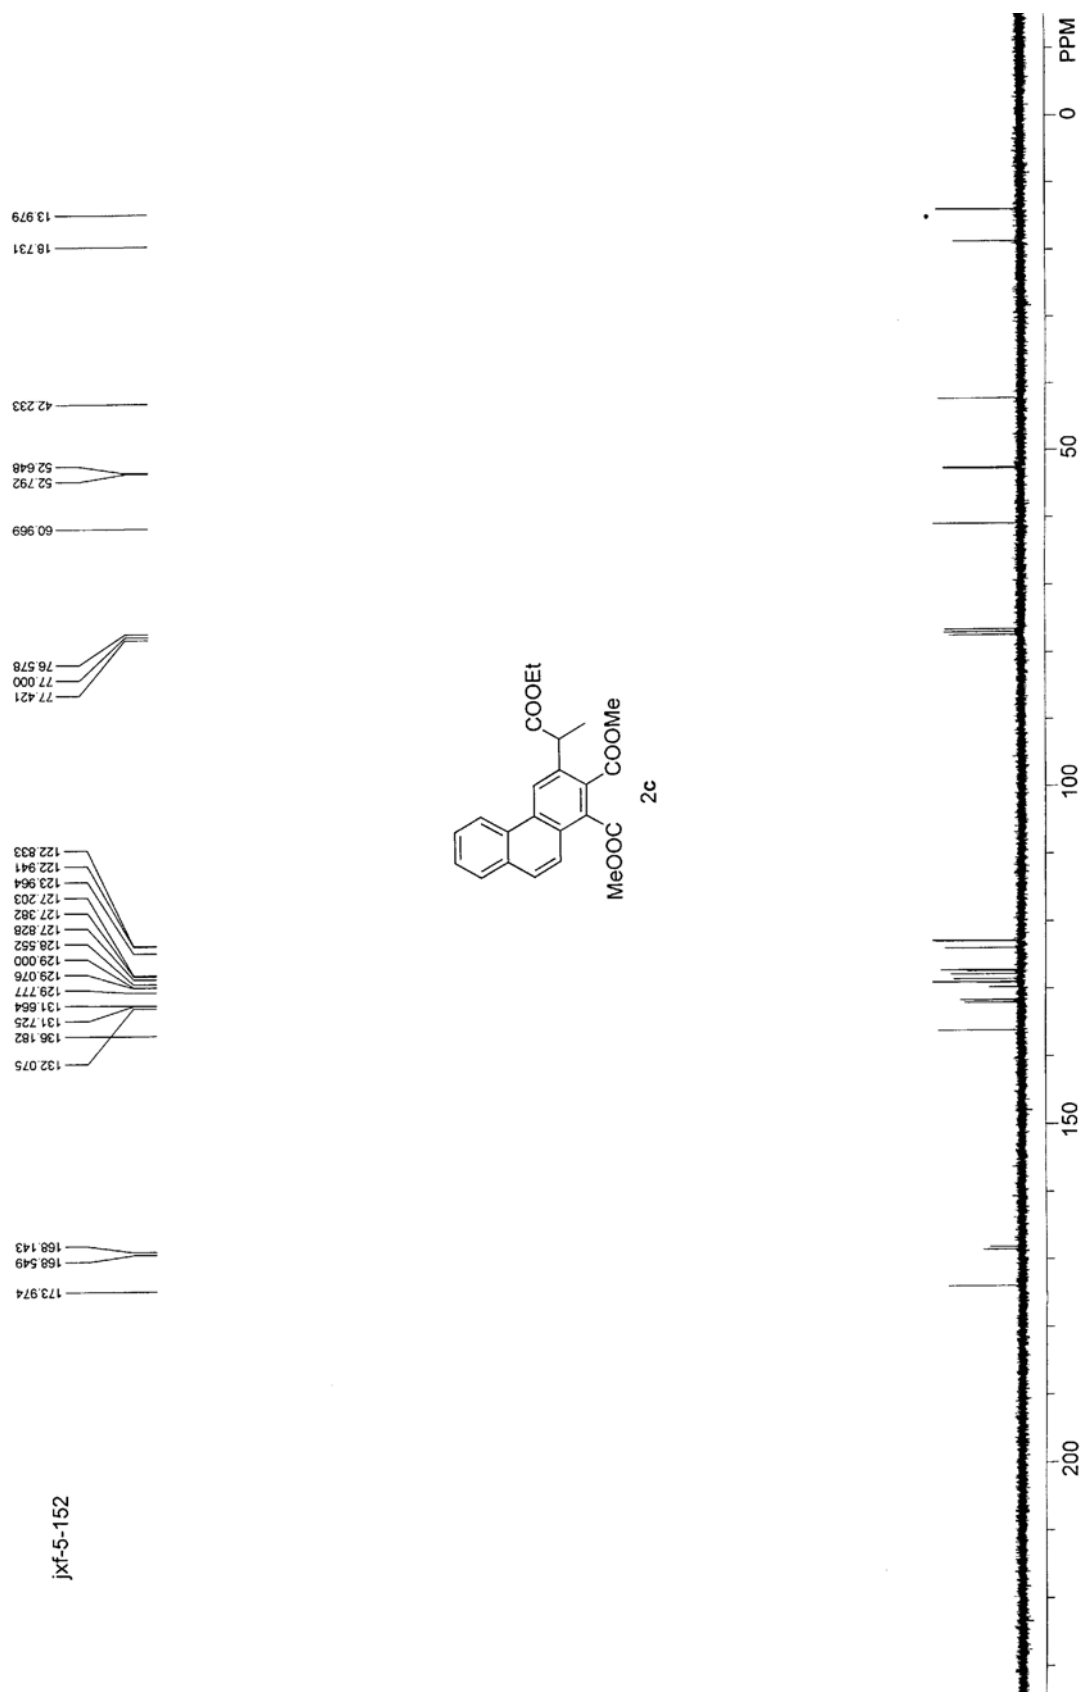

jxf-5-152

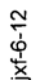

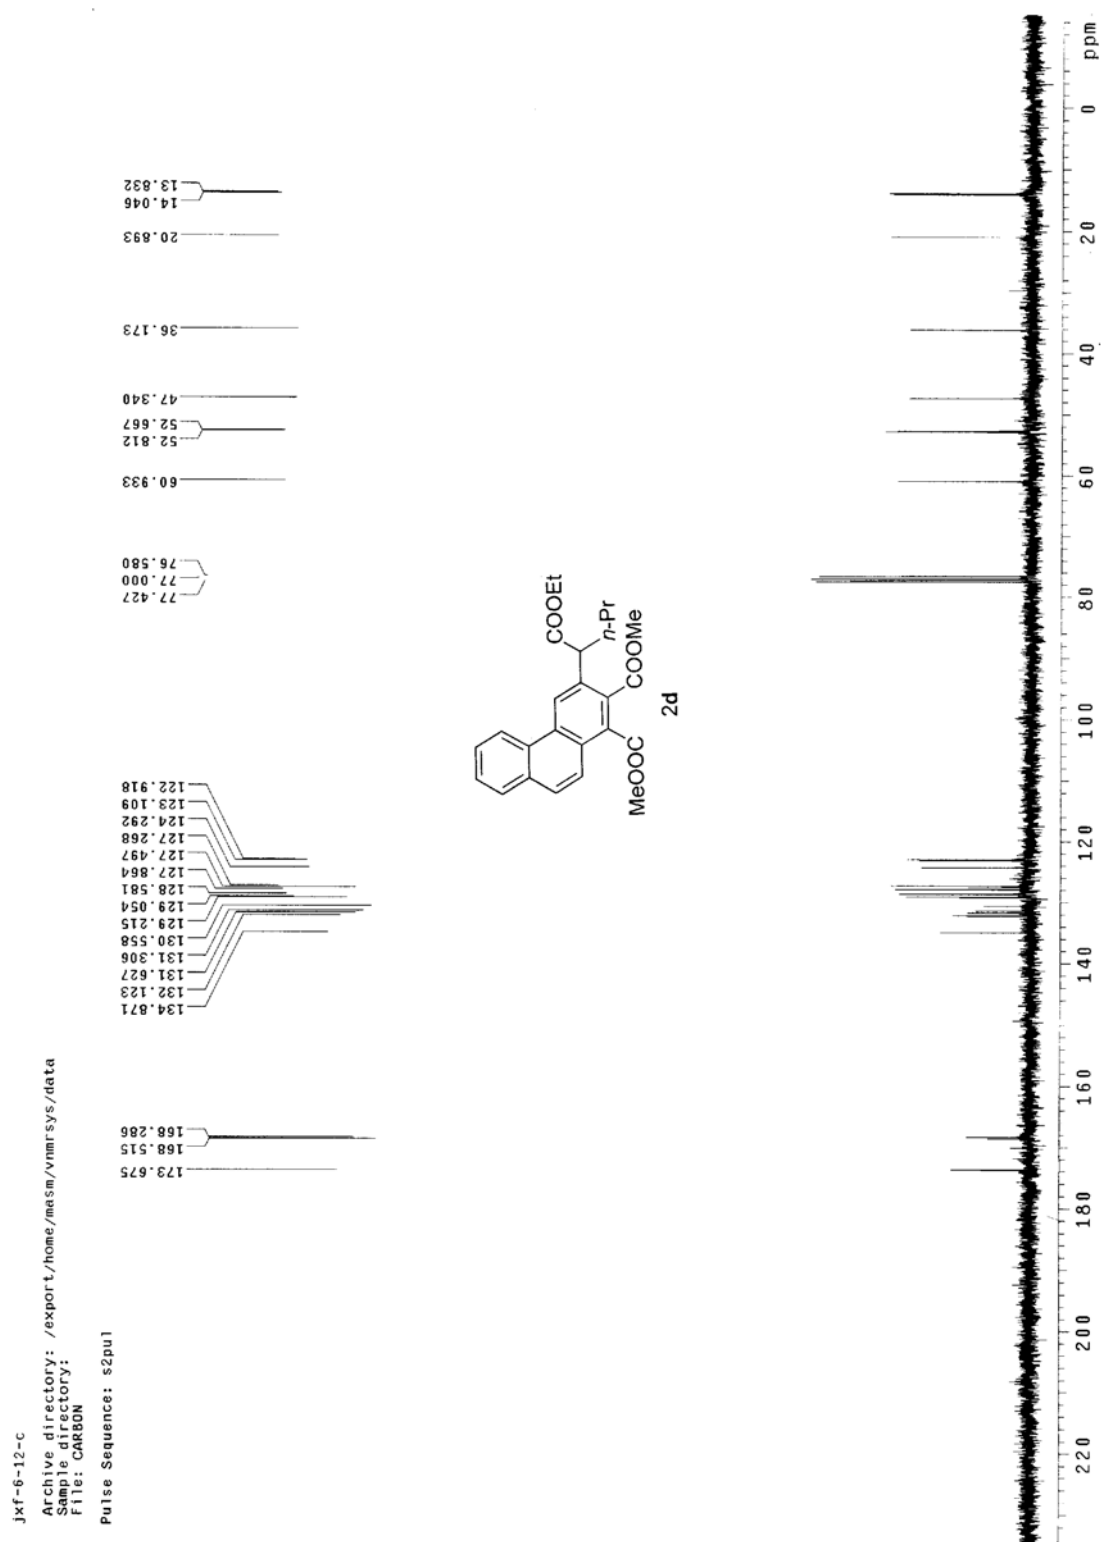

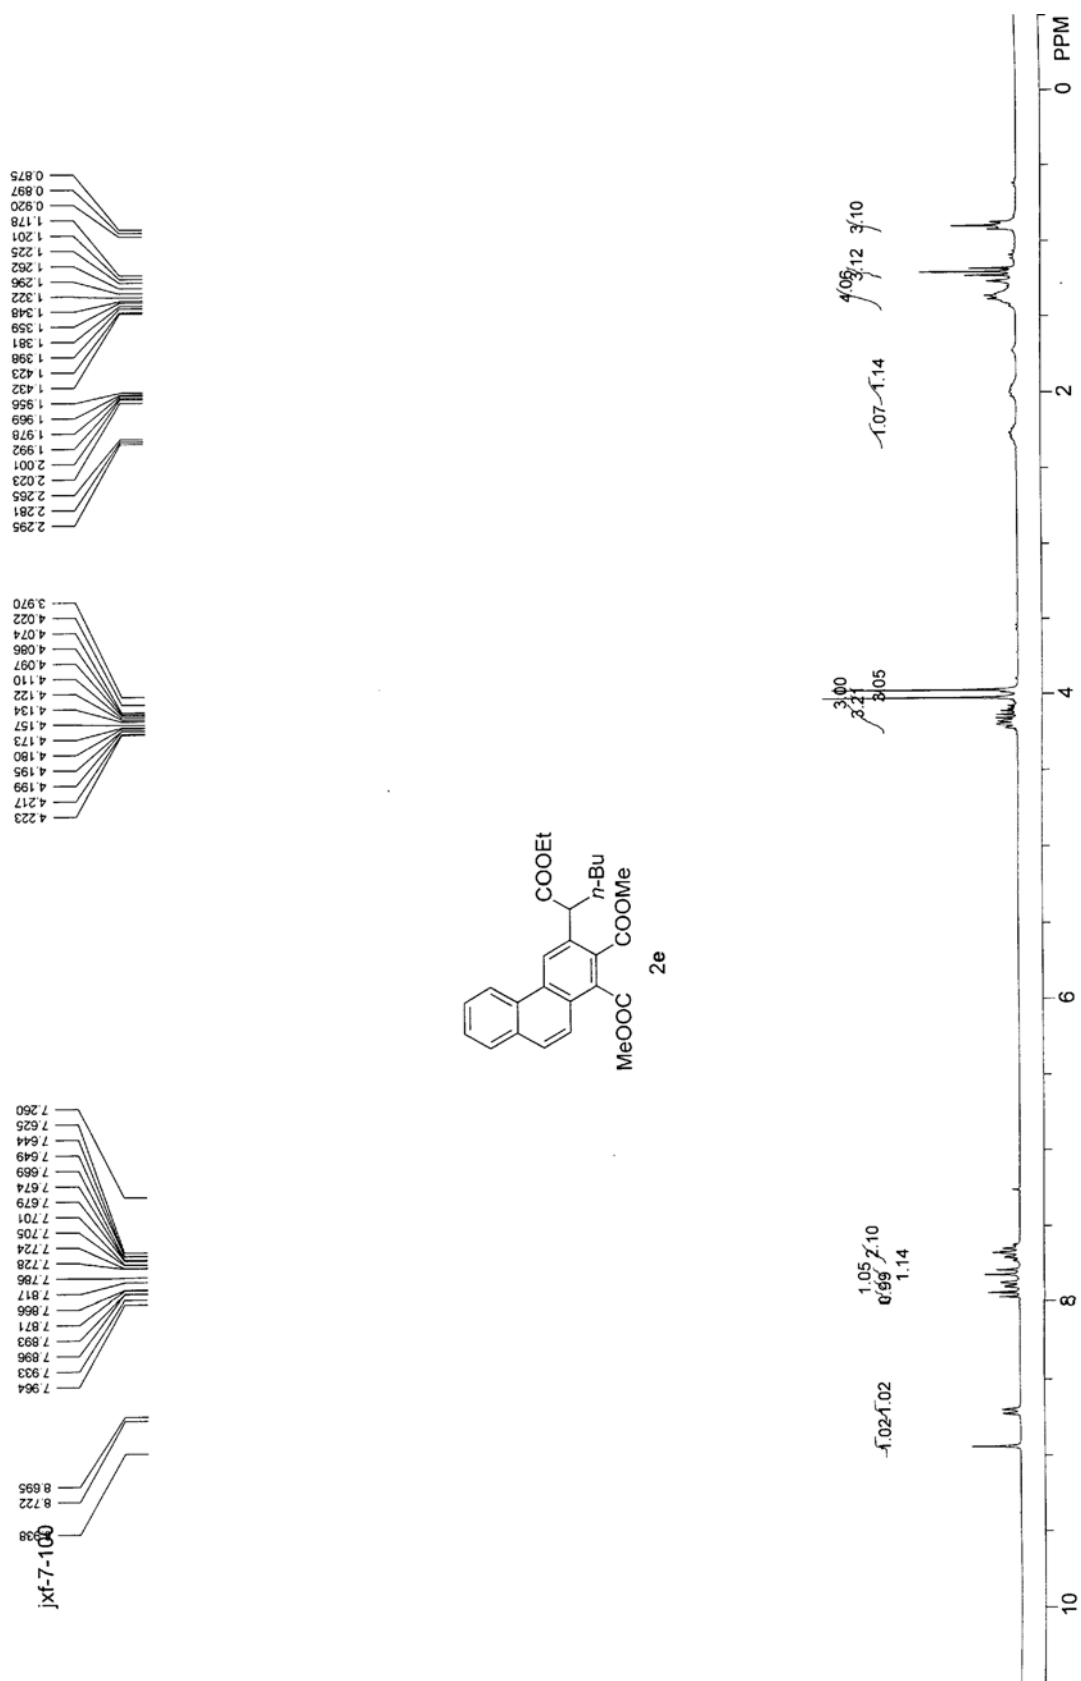

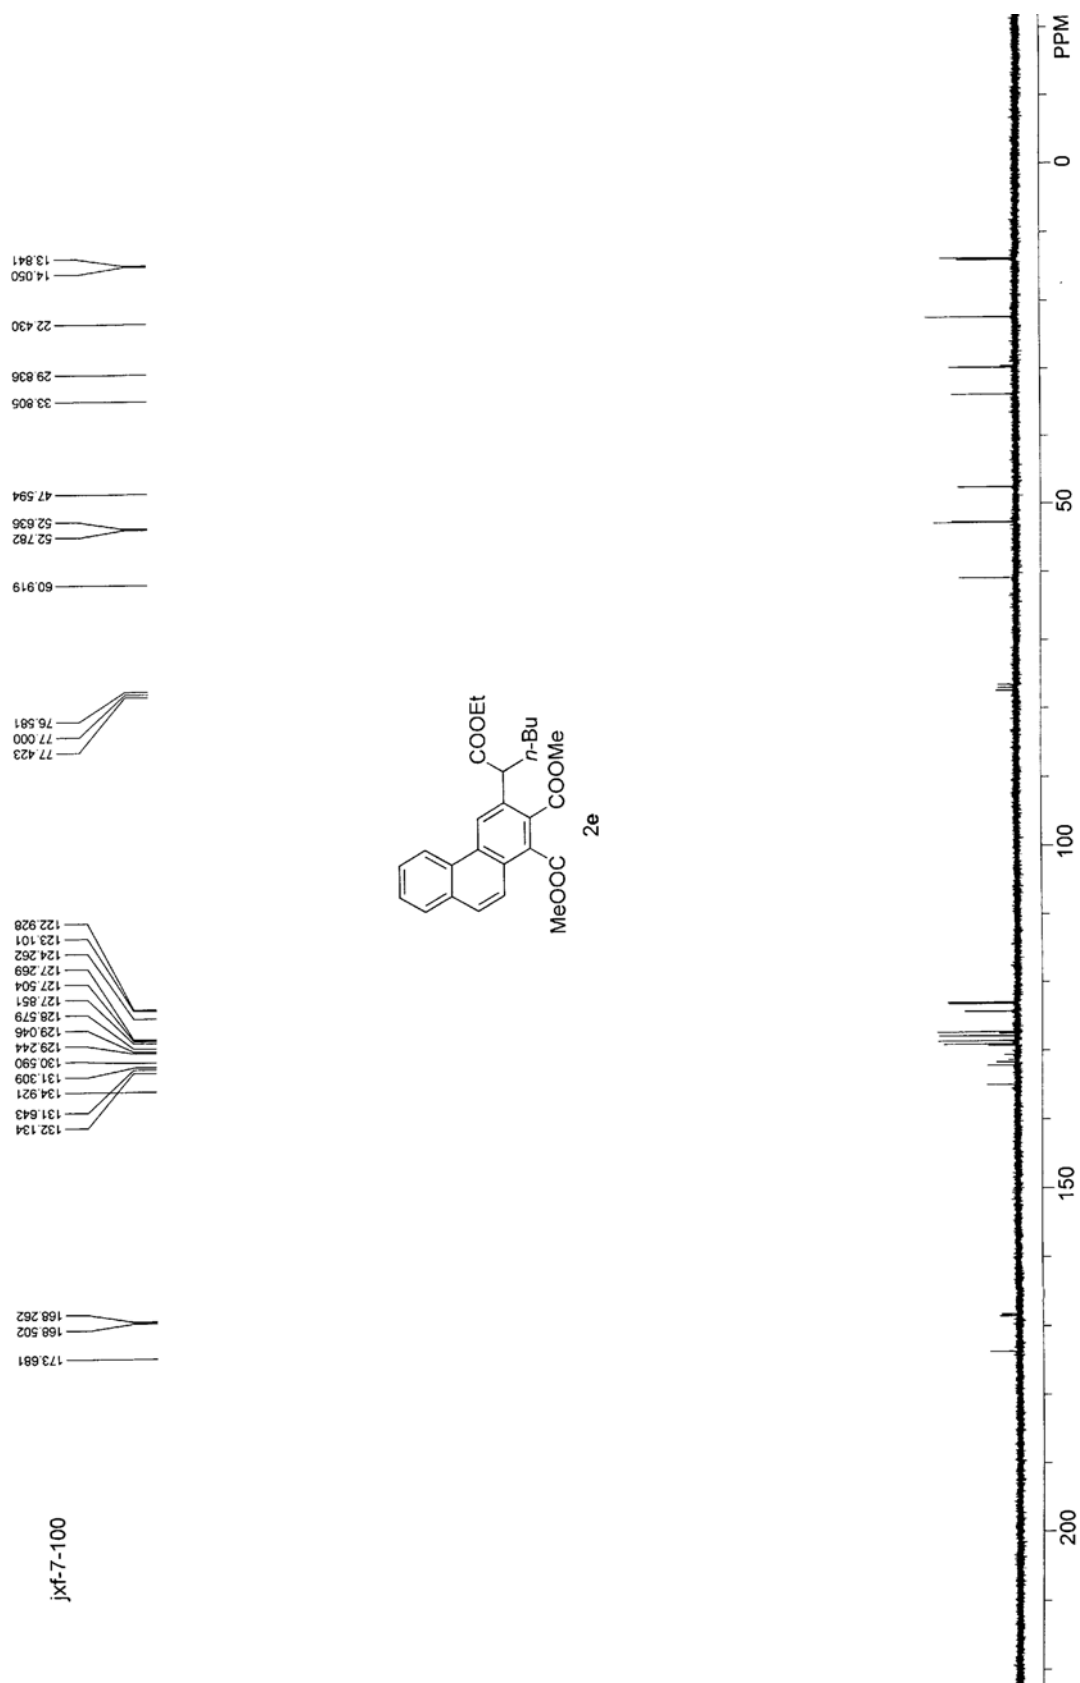

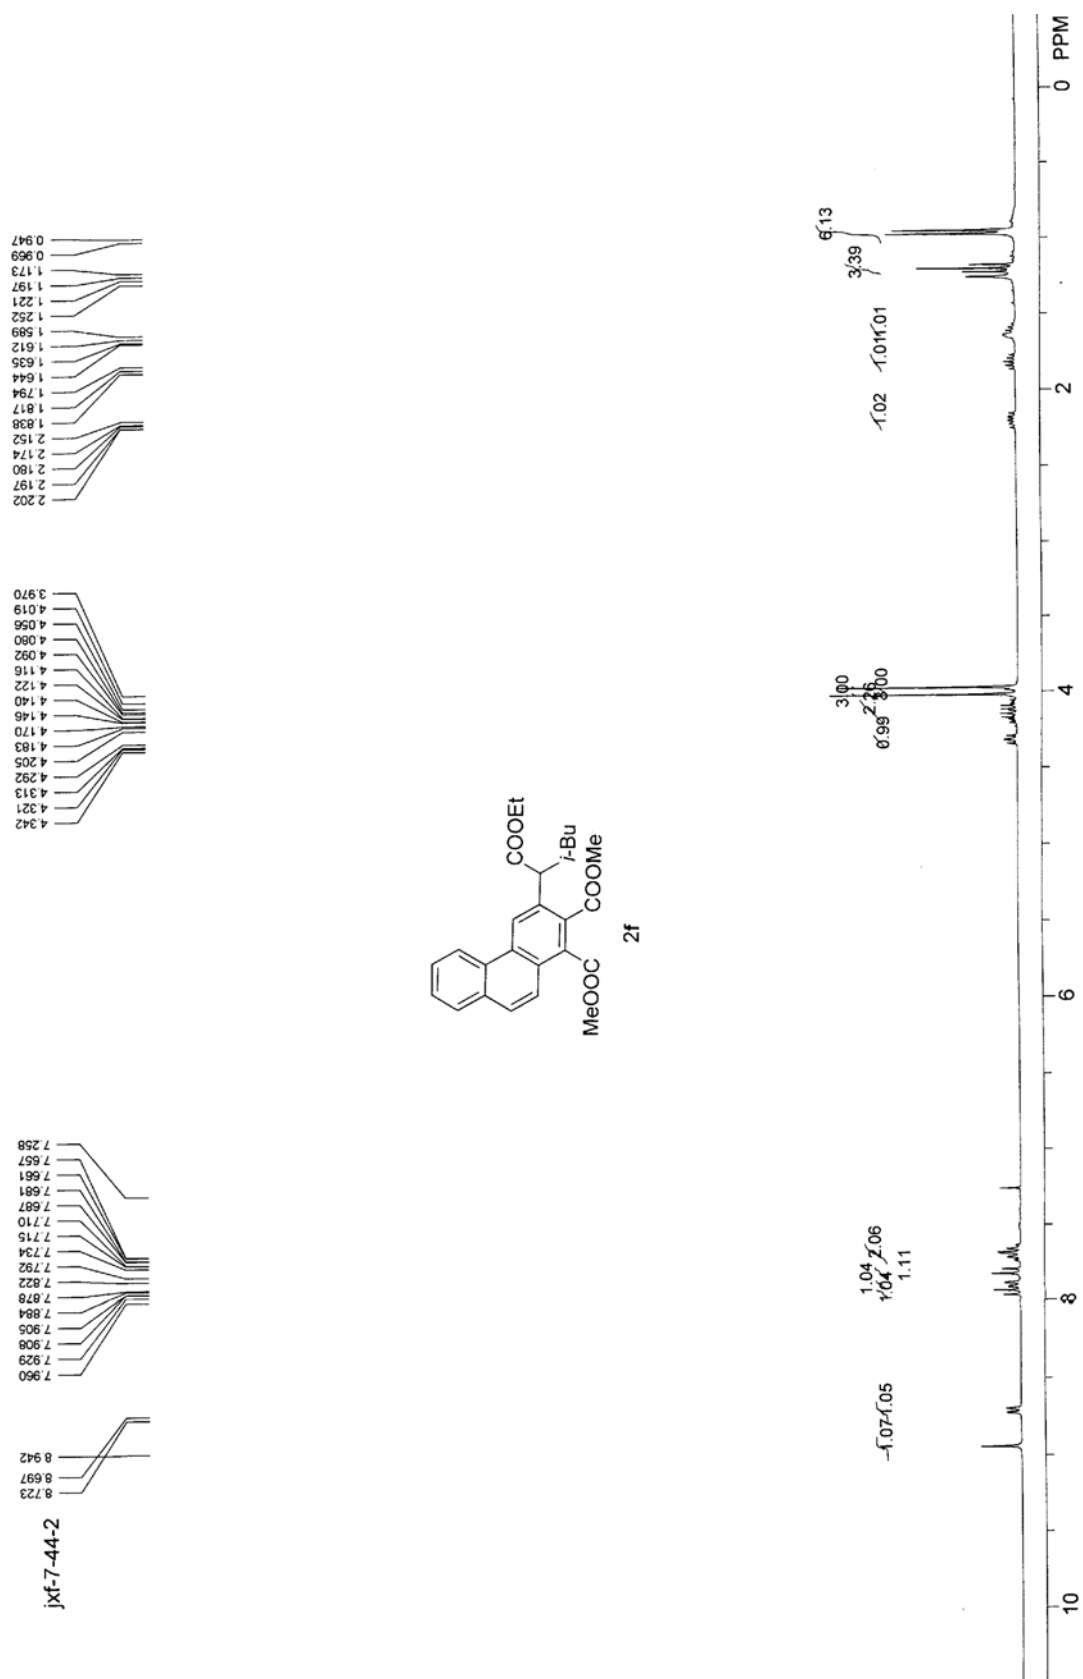



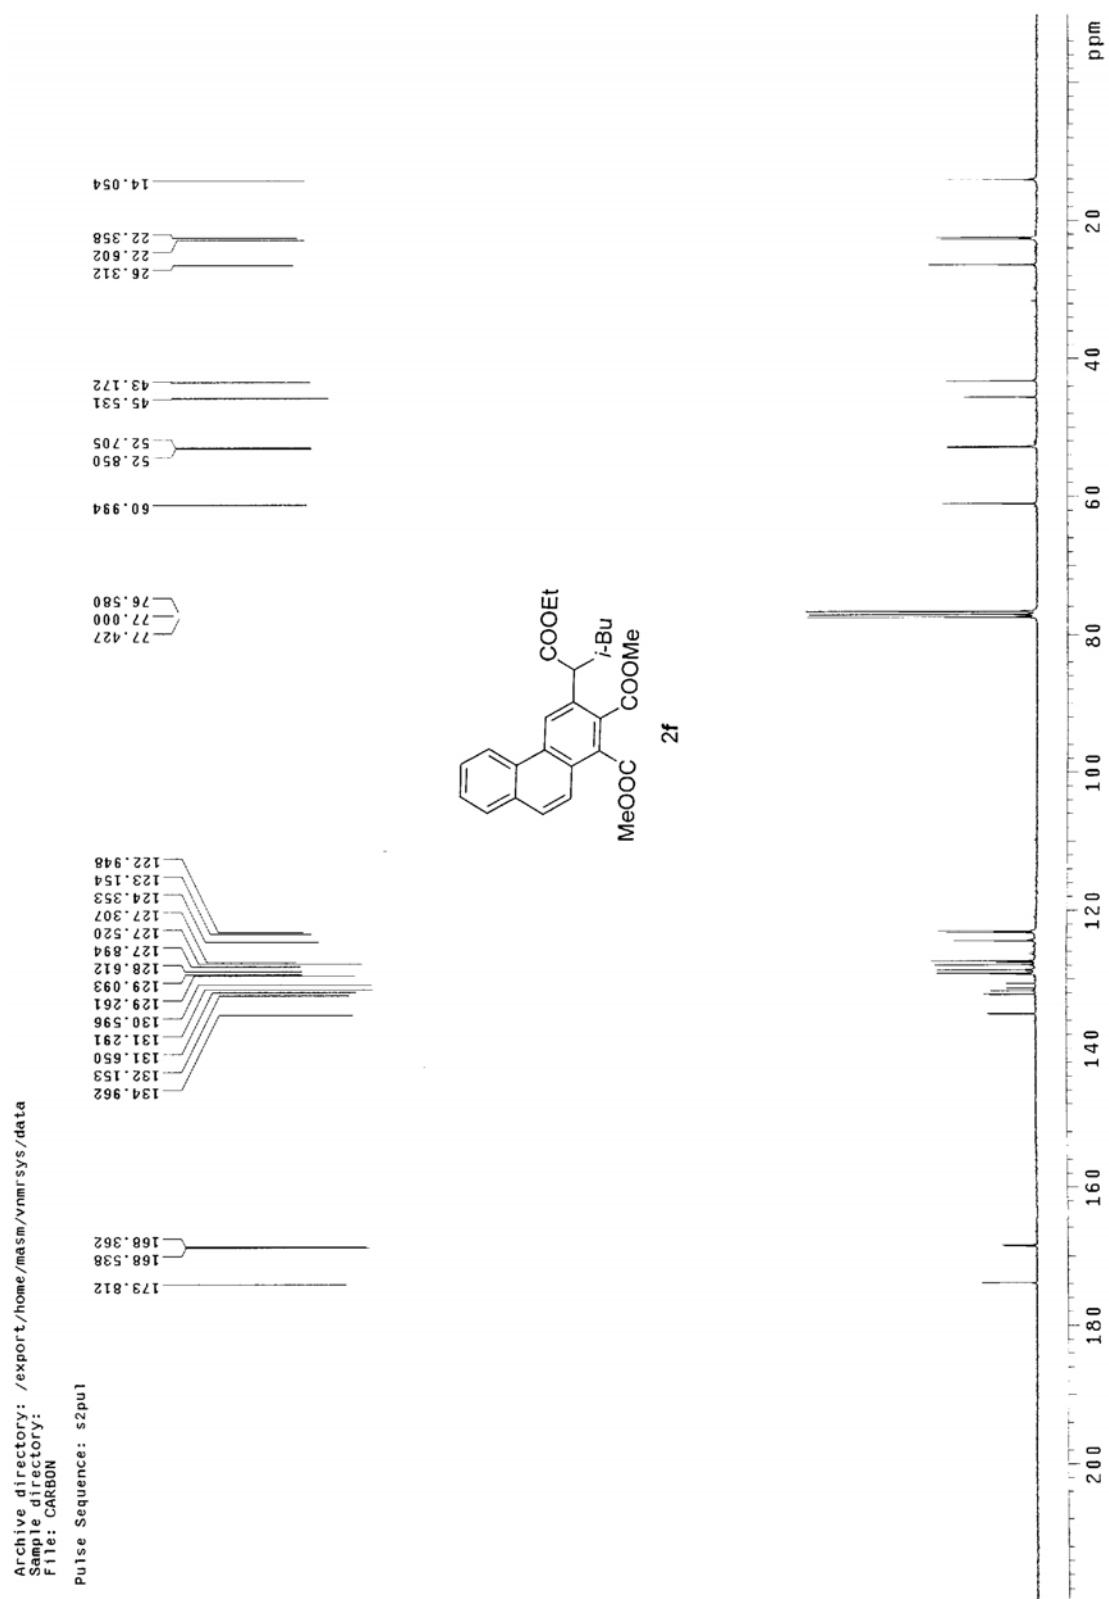

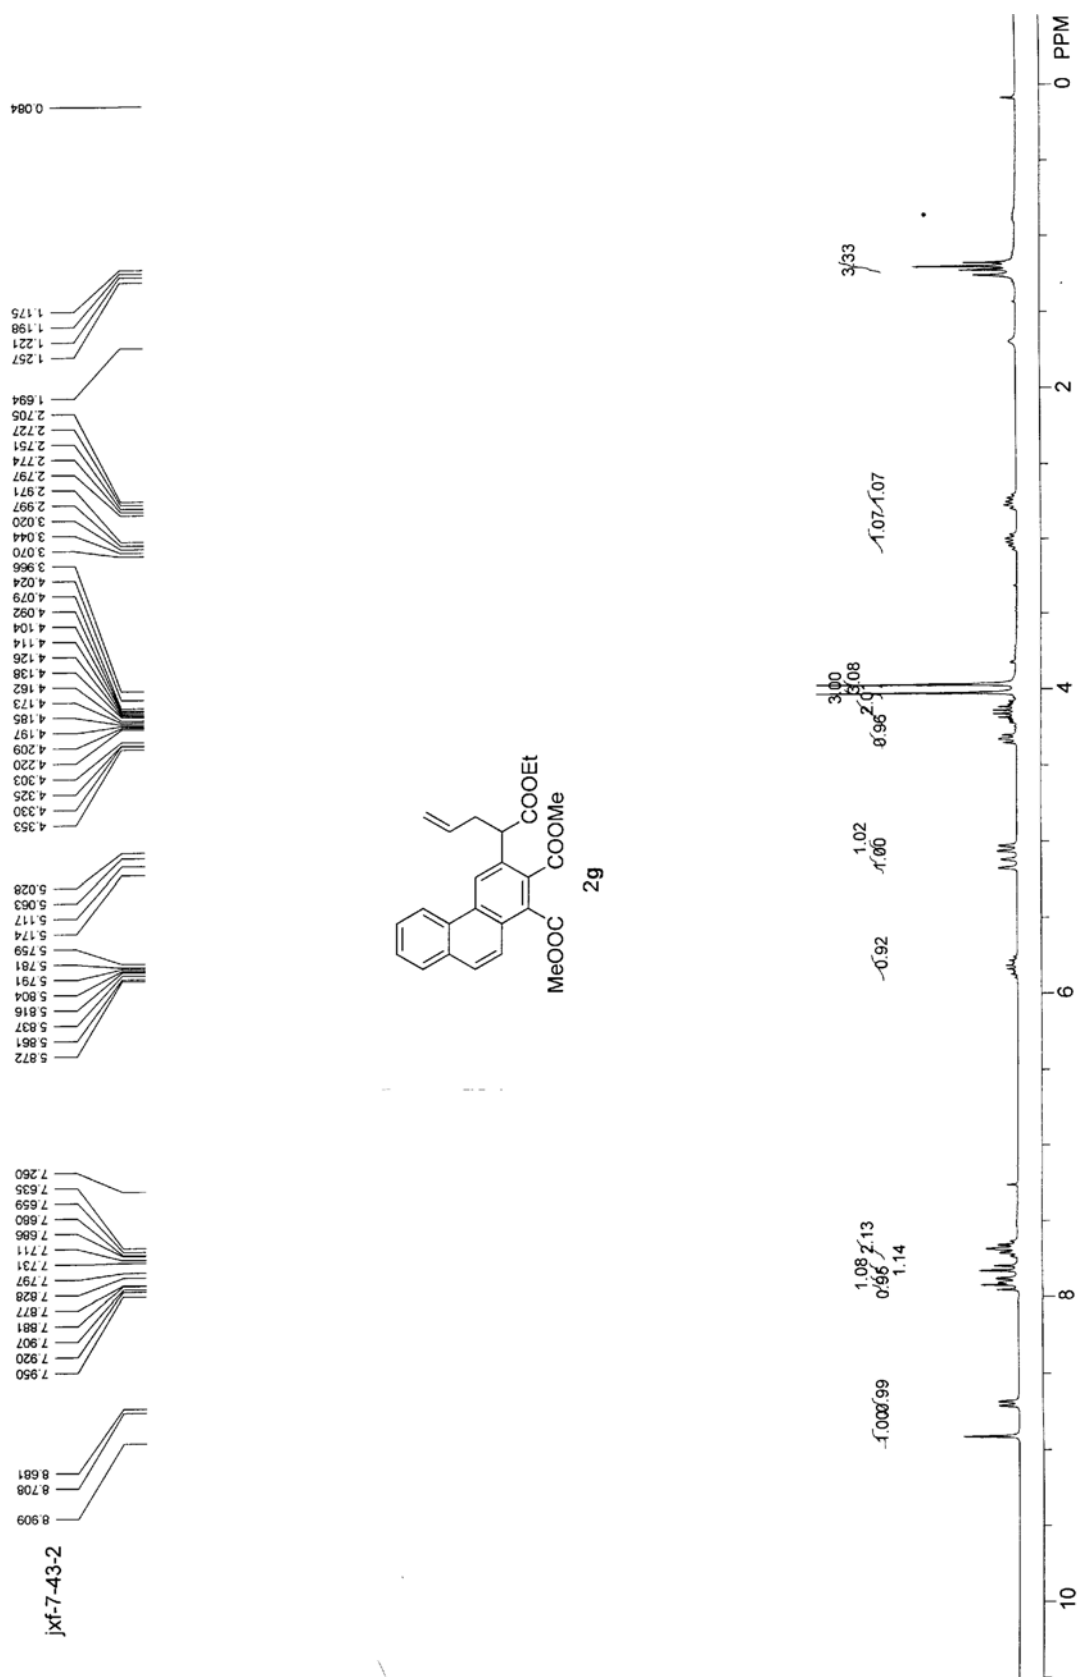

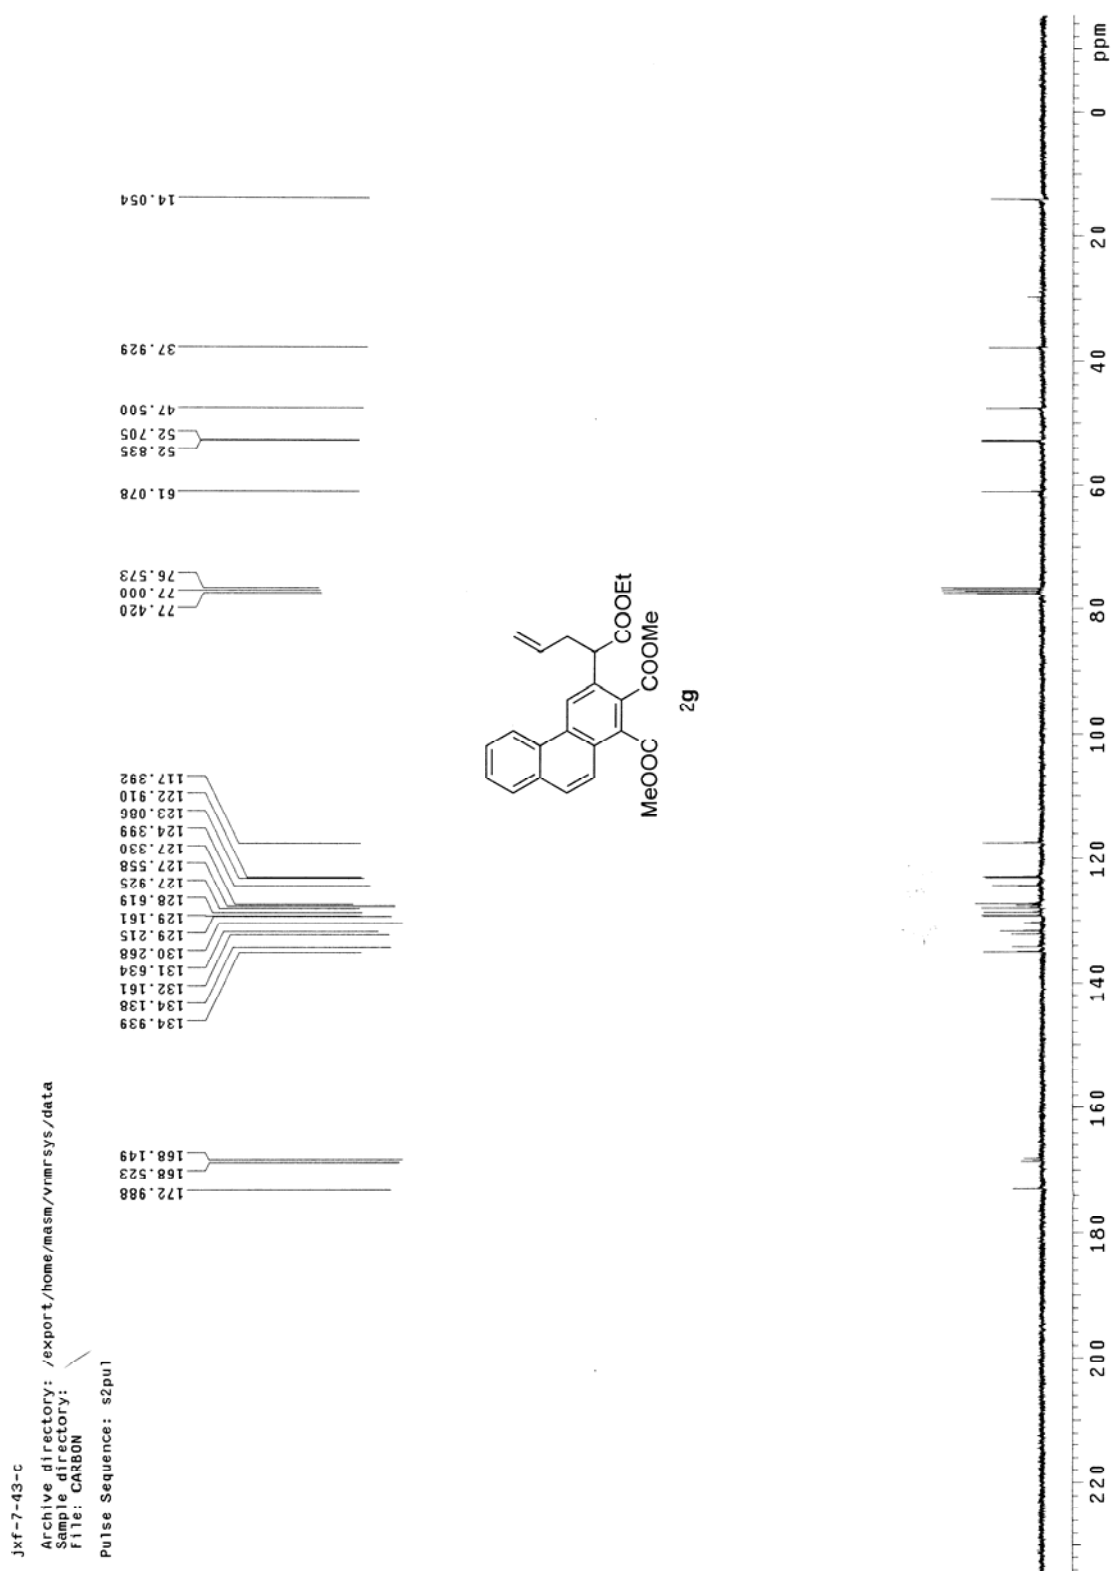

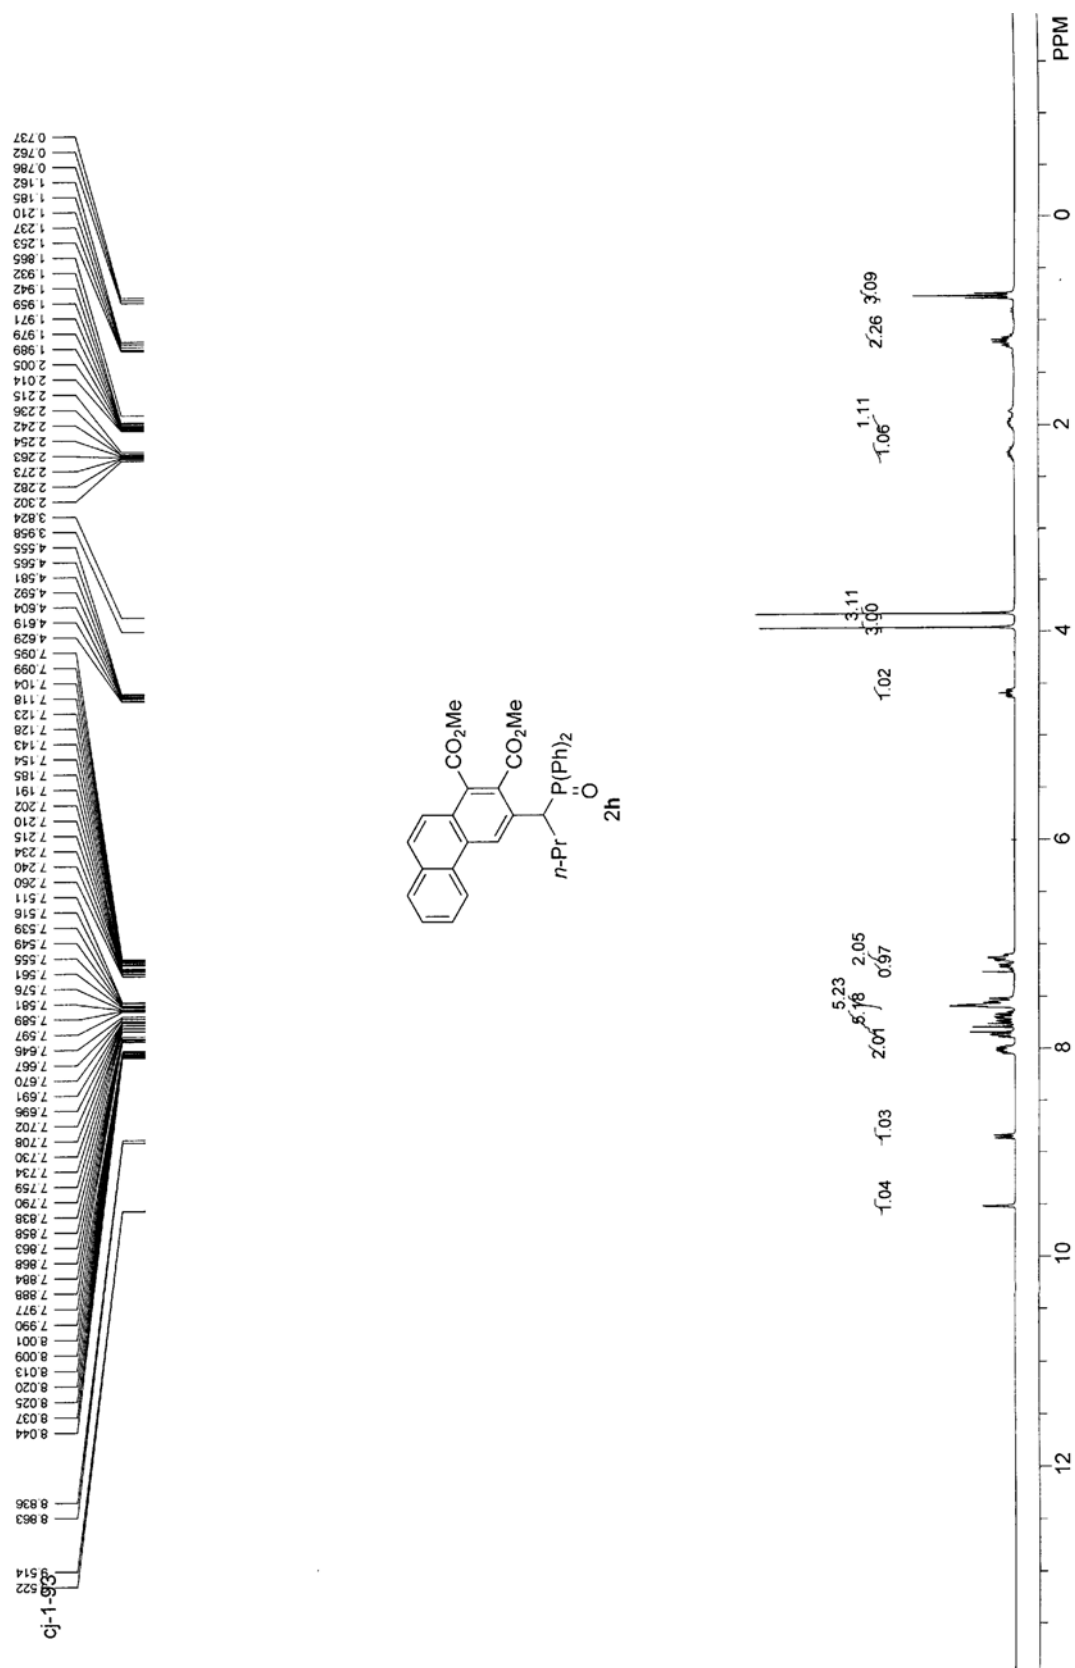

cj-1-93-p  
Archive directory: /export/home/masm/vnmrsys/data  
Sample directory:  
Pulse Sequence: s2pu1

— 34.463

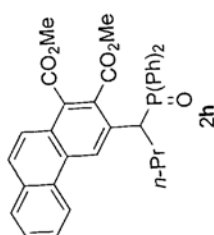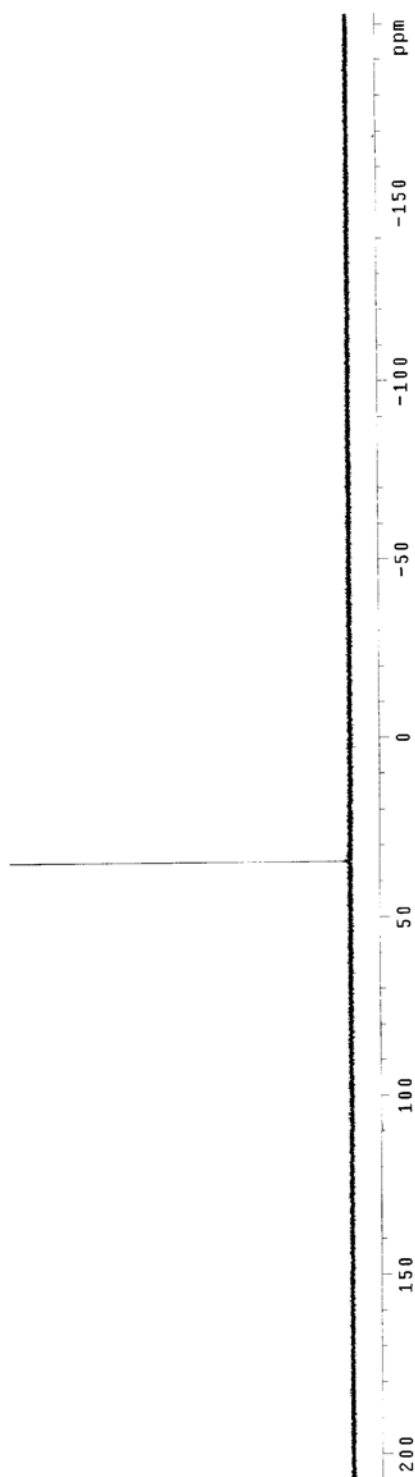

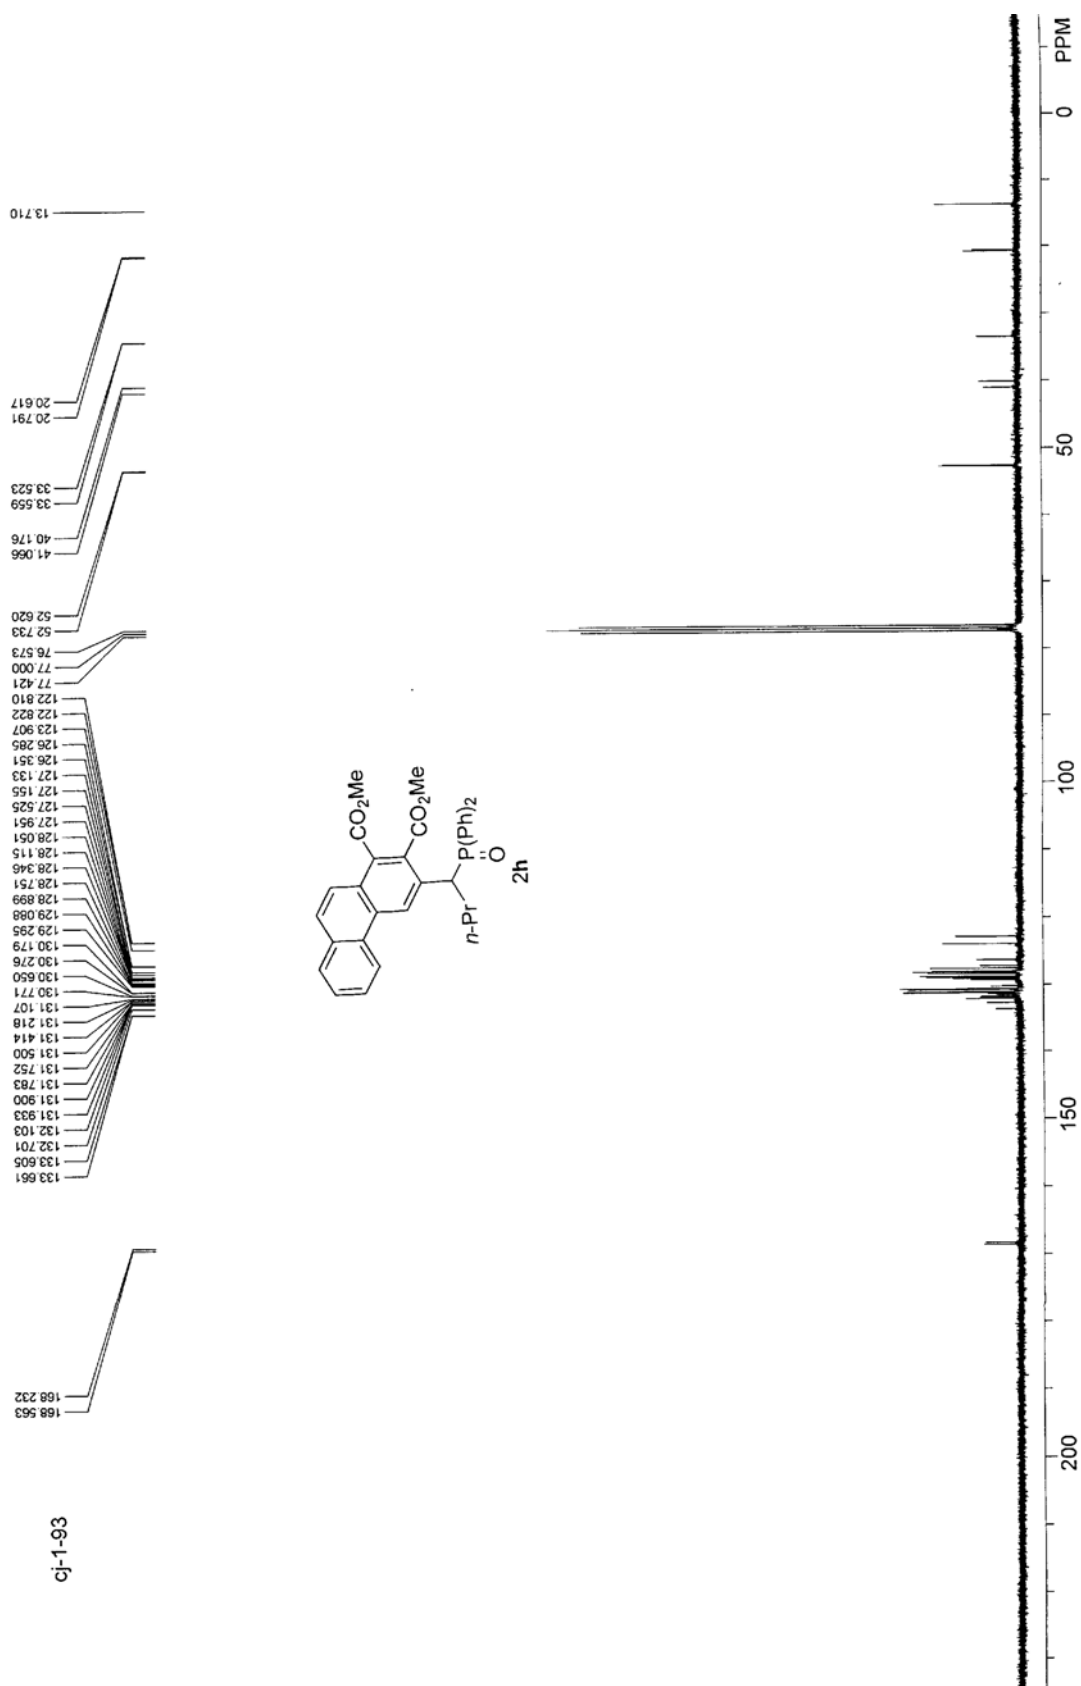

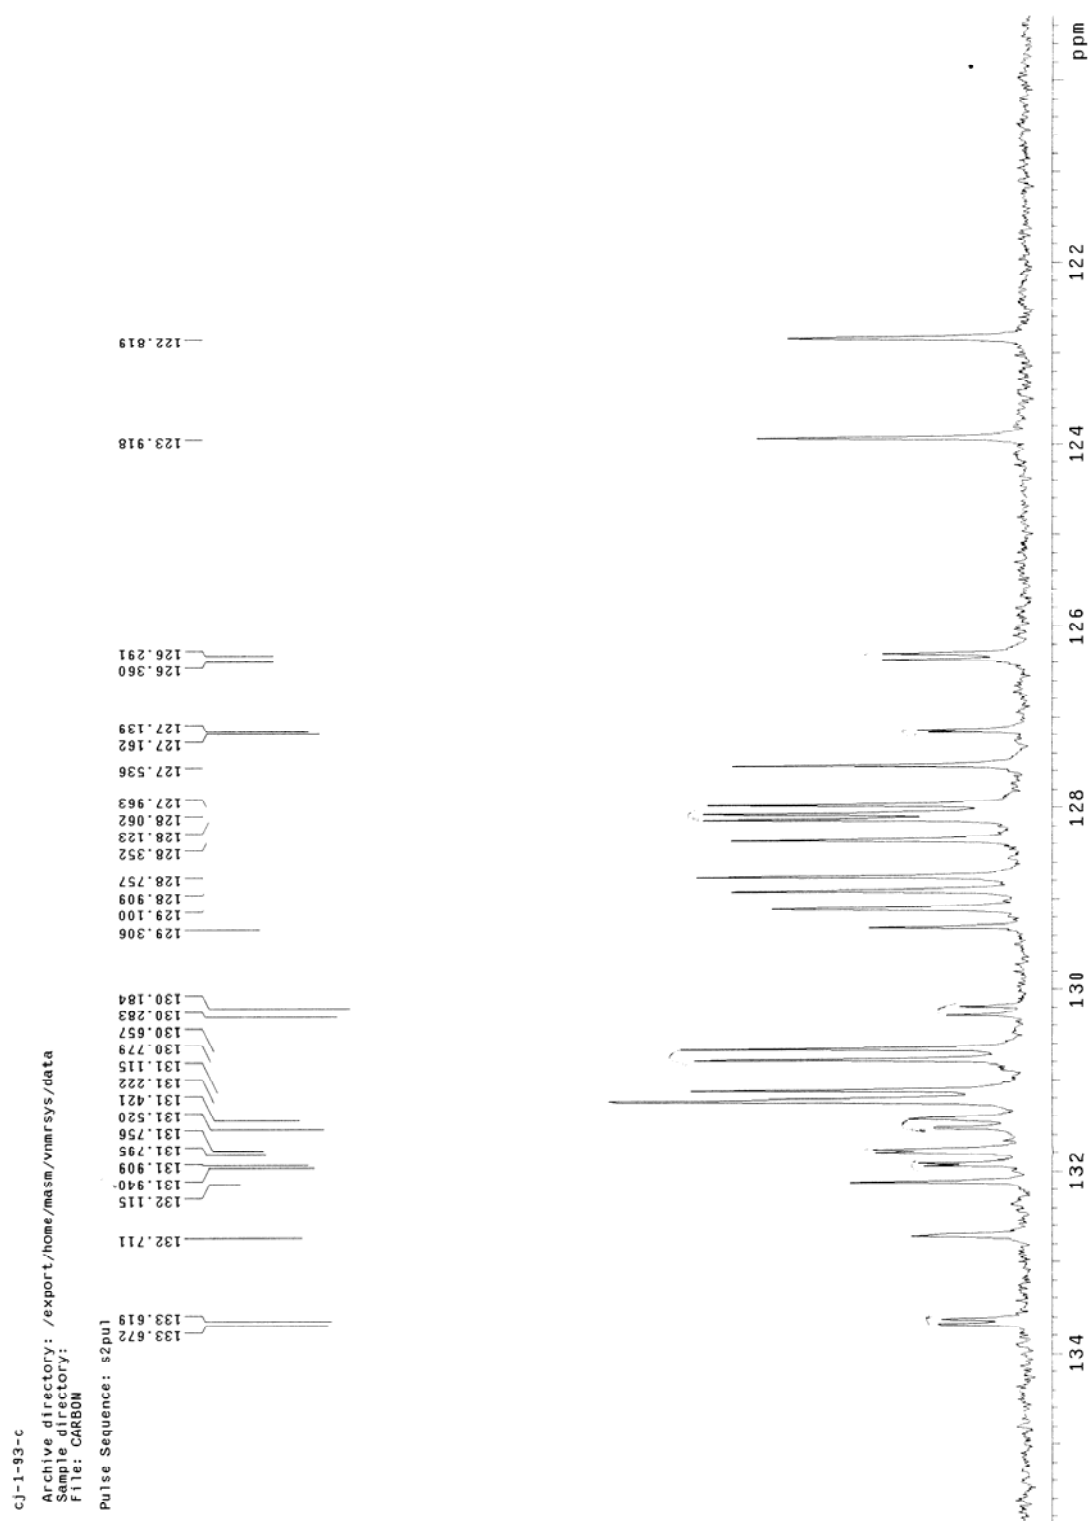

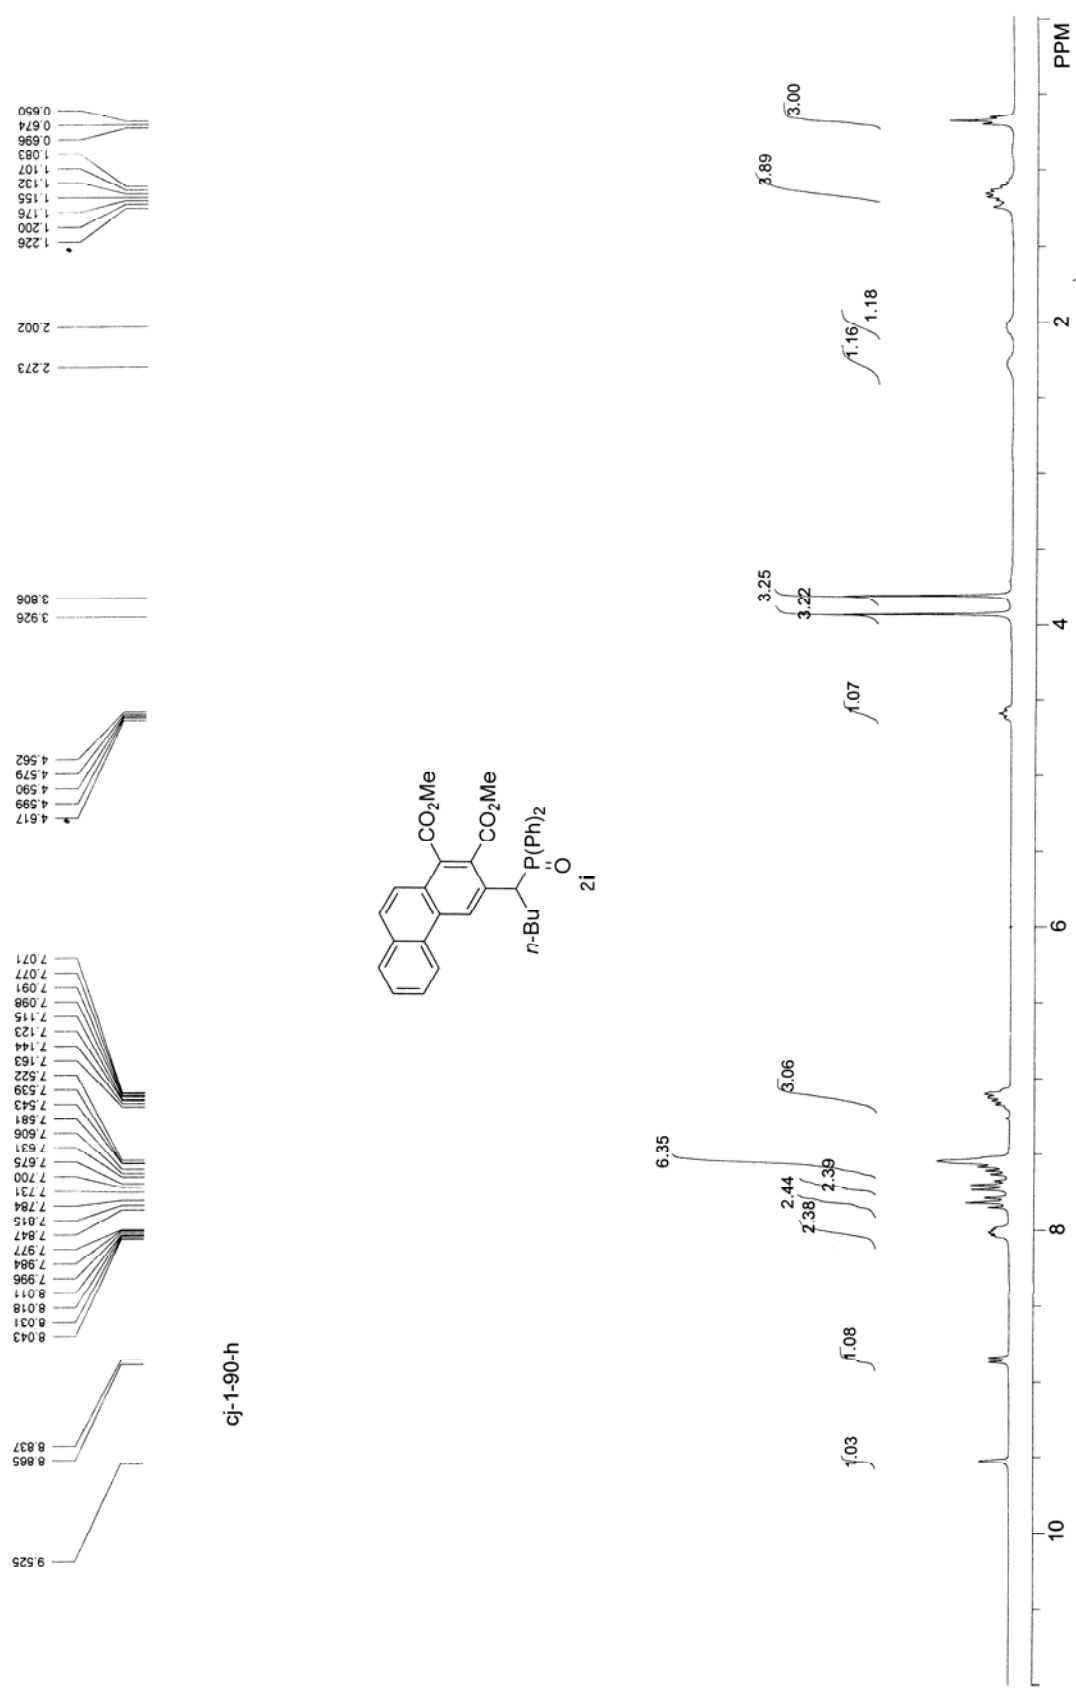



cj-1-90-p  
Archive directory: /export/home/masm/vnmr/sys/data  
Sample directory:  
File: PHOSPHORUS  
Pulse Sequence: szpul

34.640

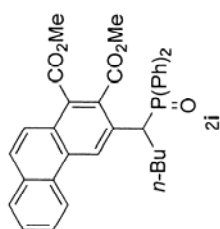

200 150 100 50 0 -50 -100 ppm

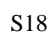

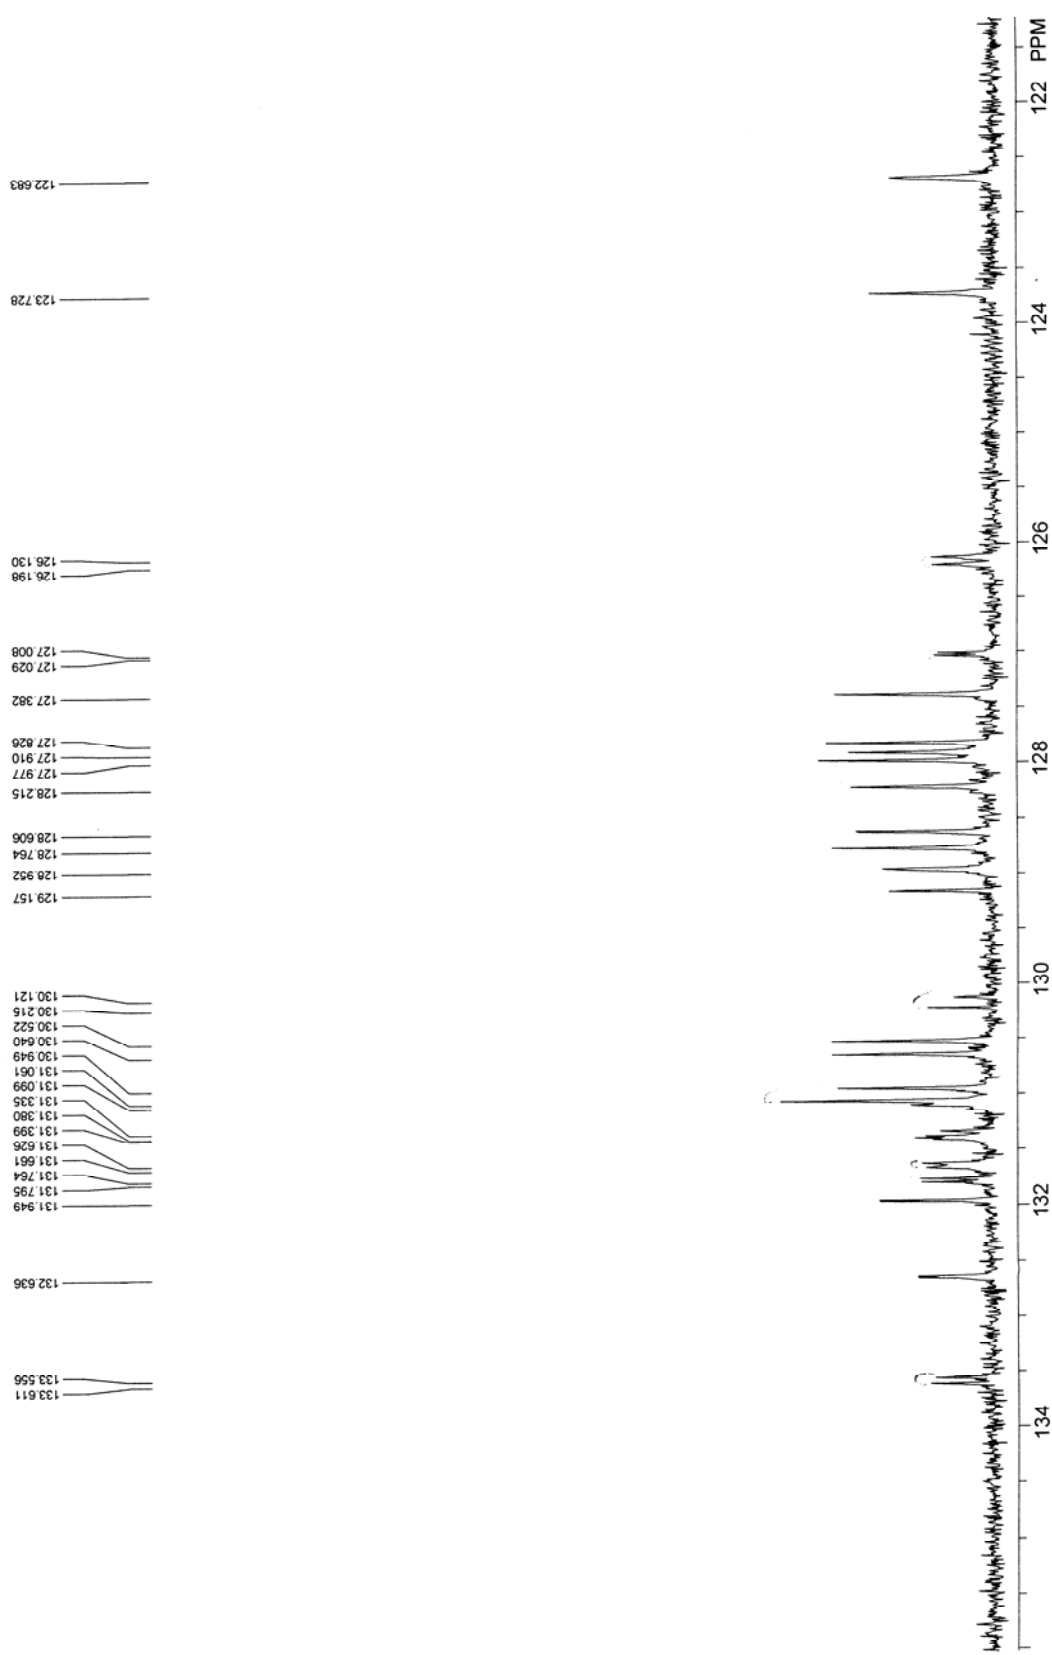

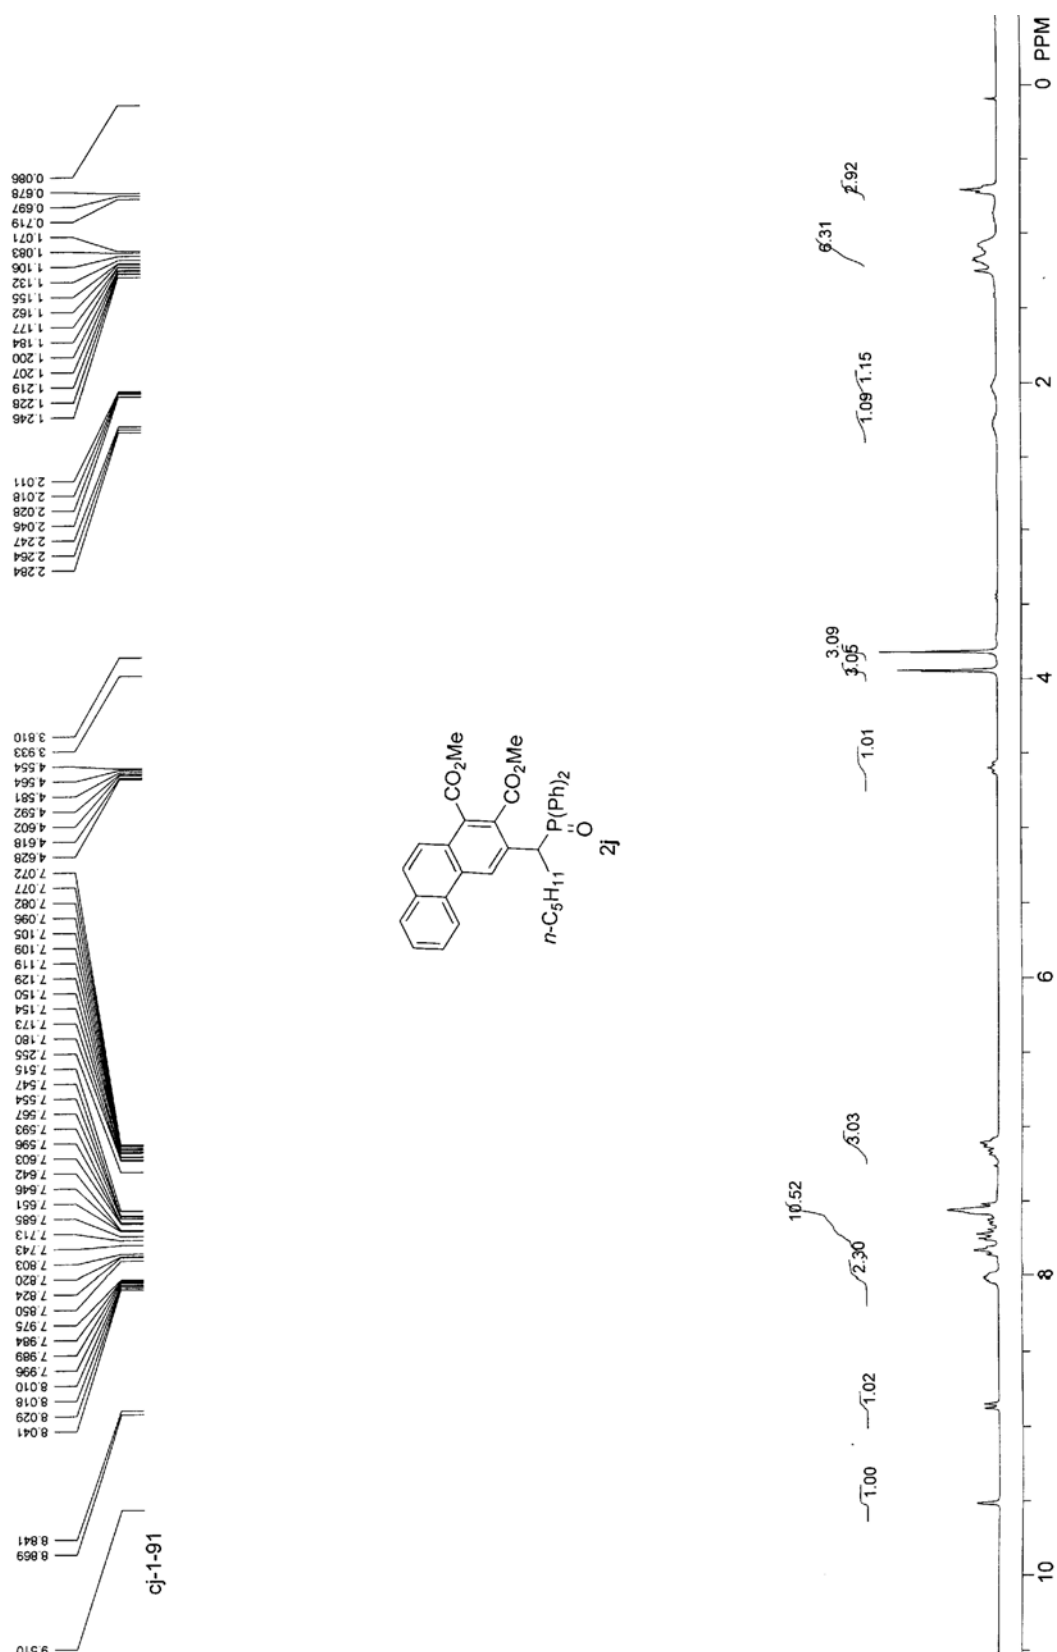

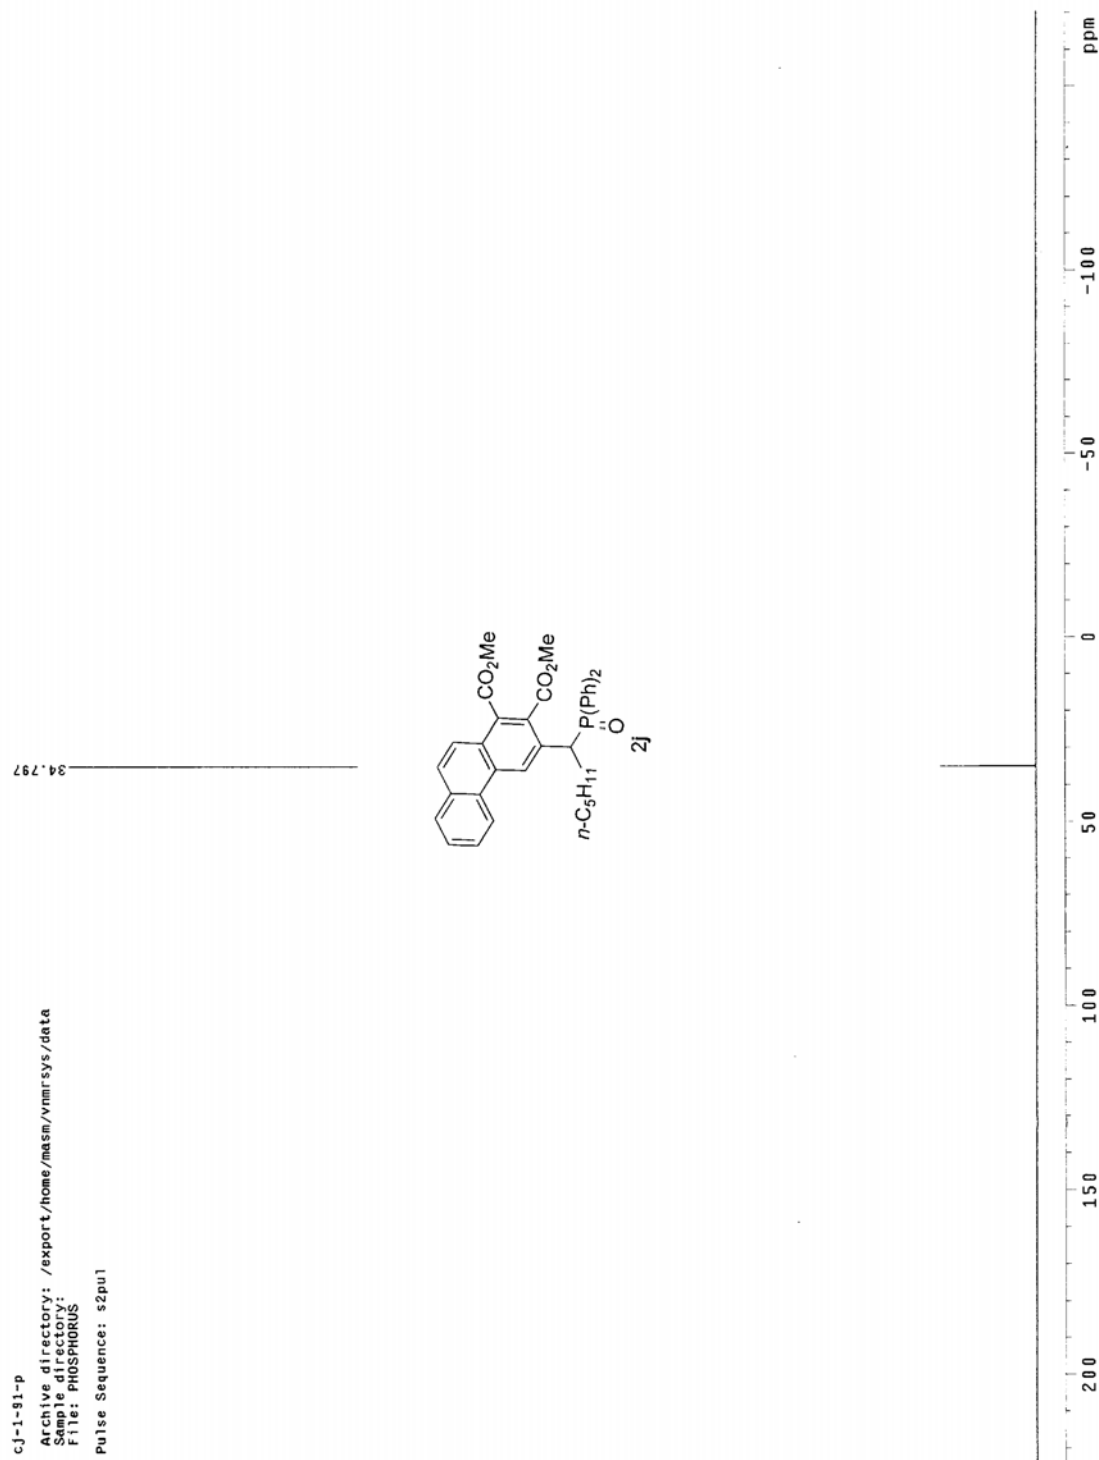

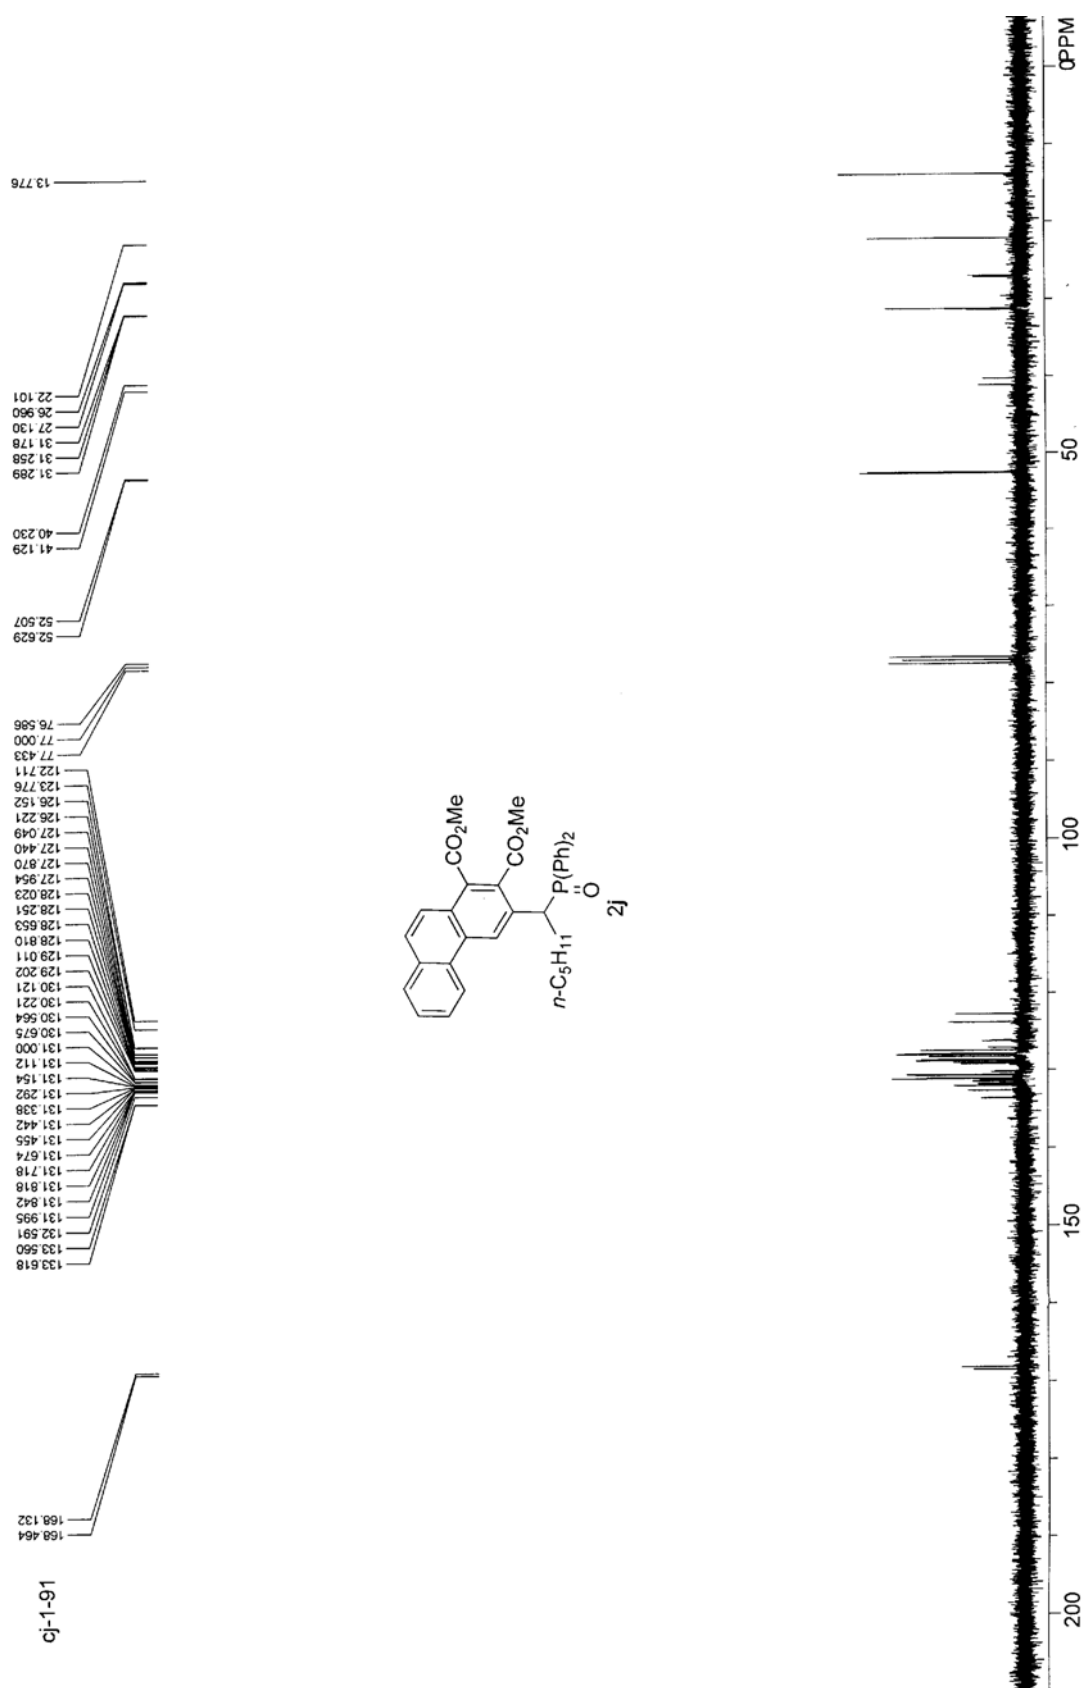

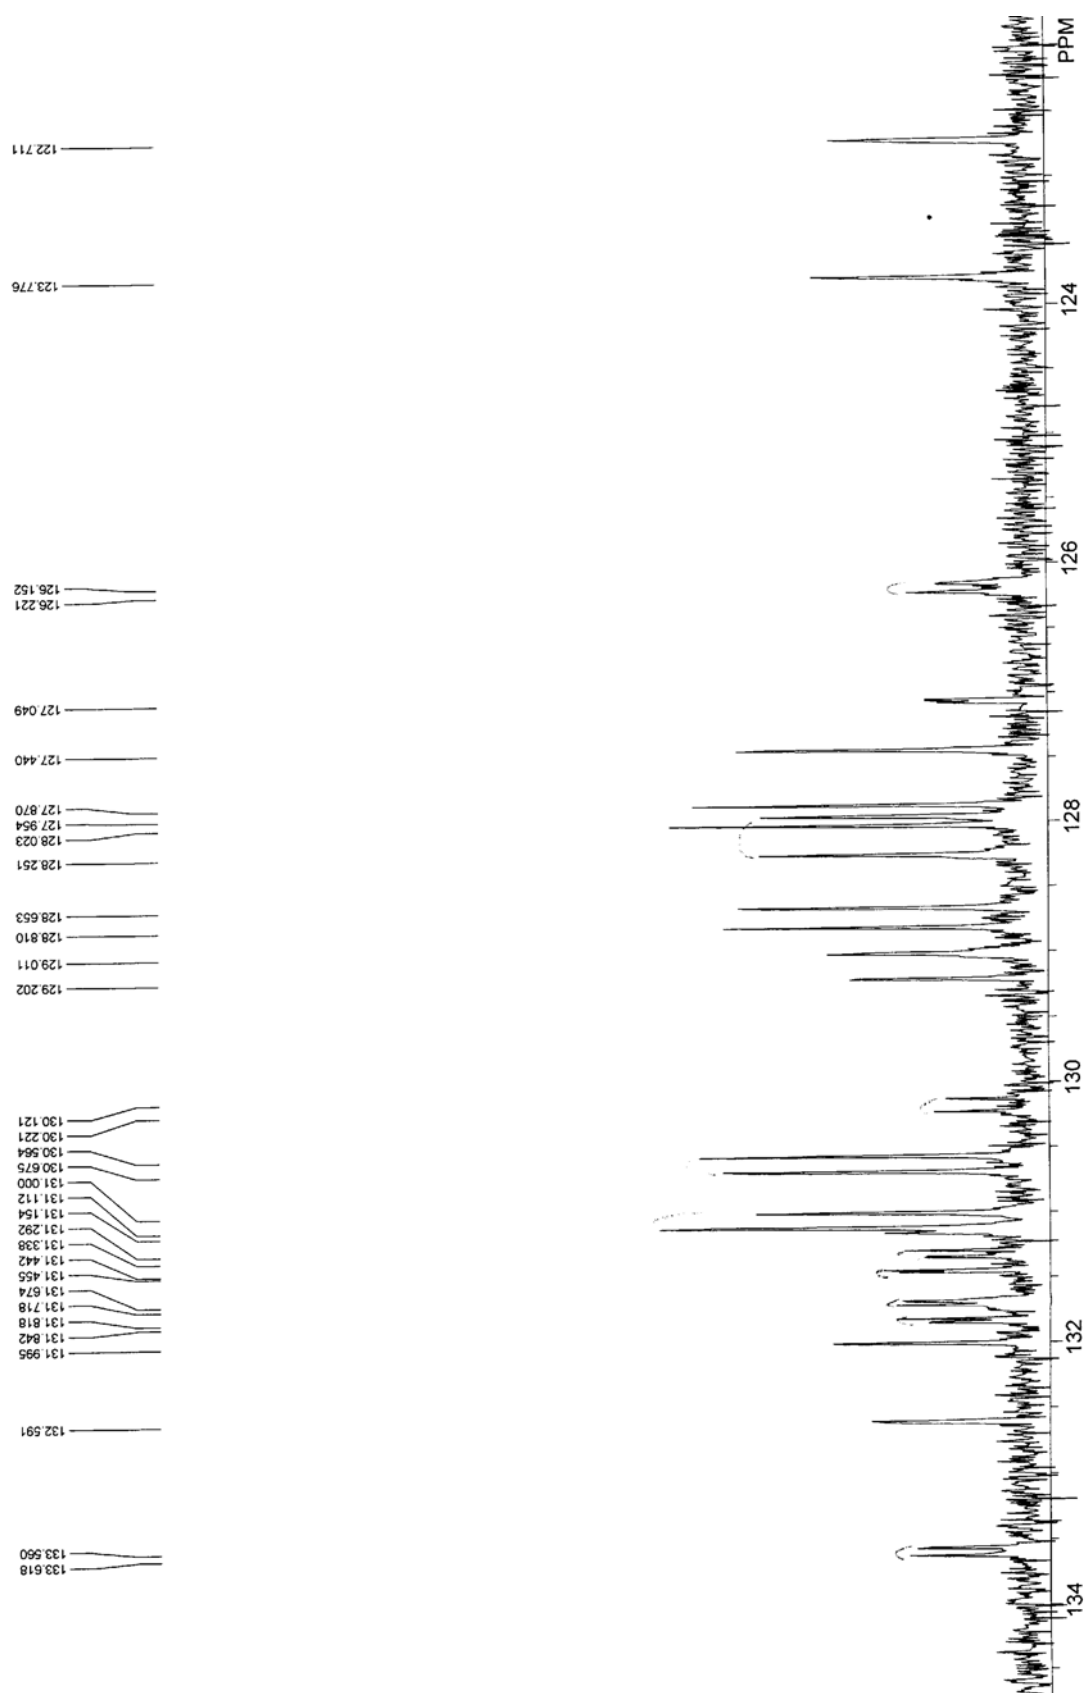

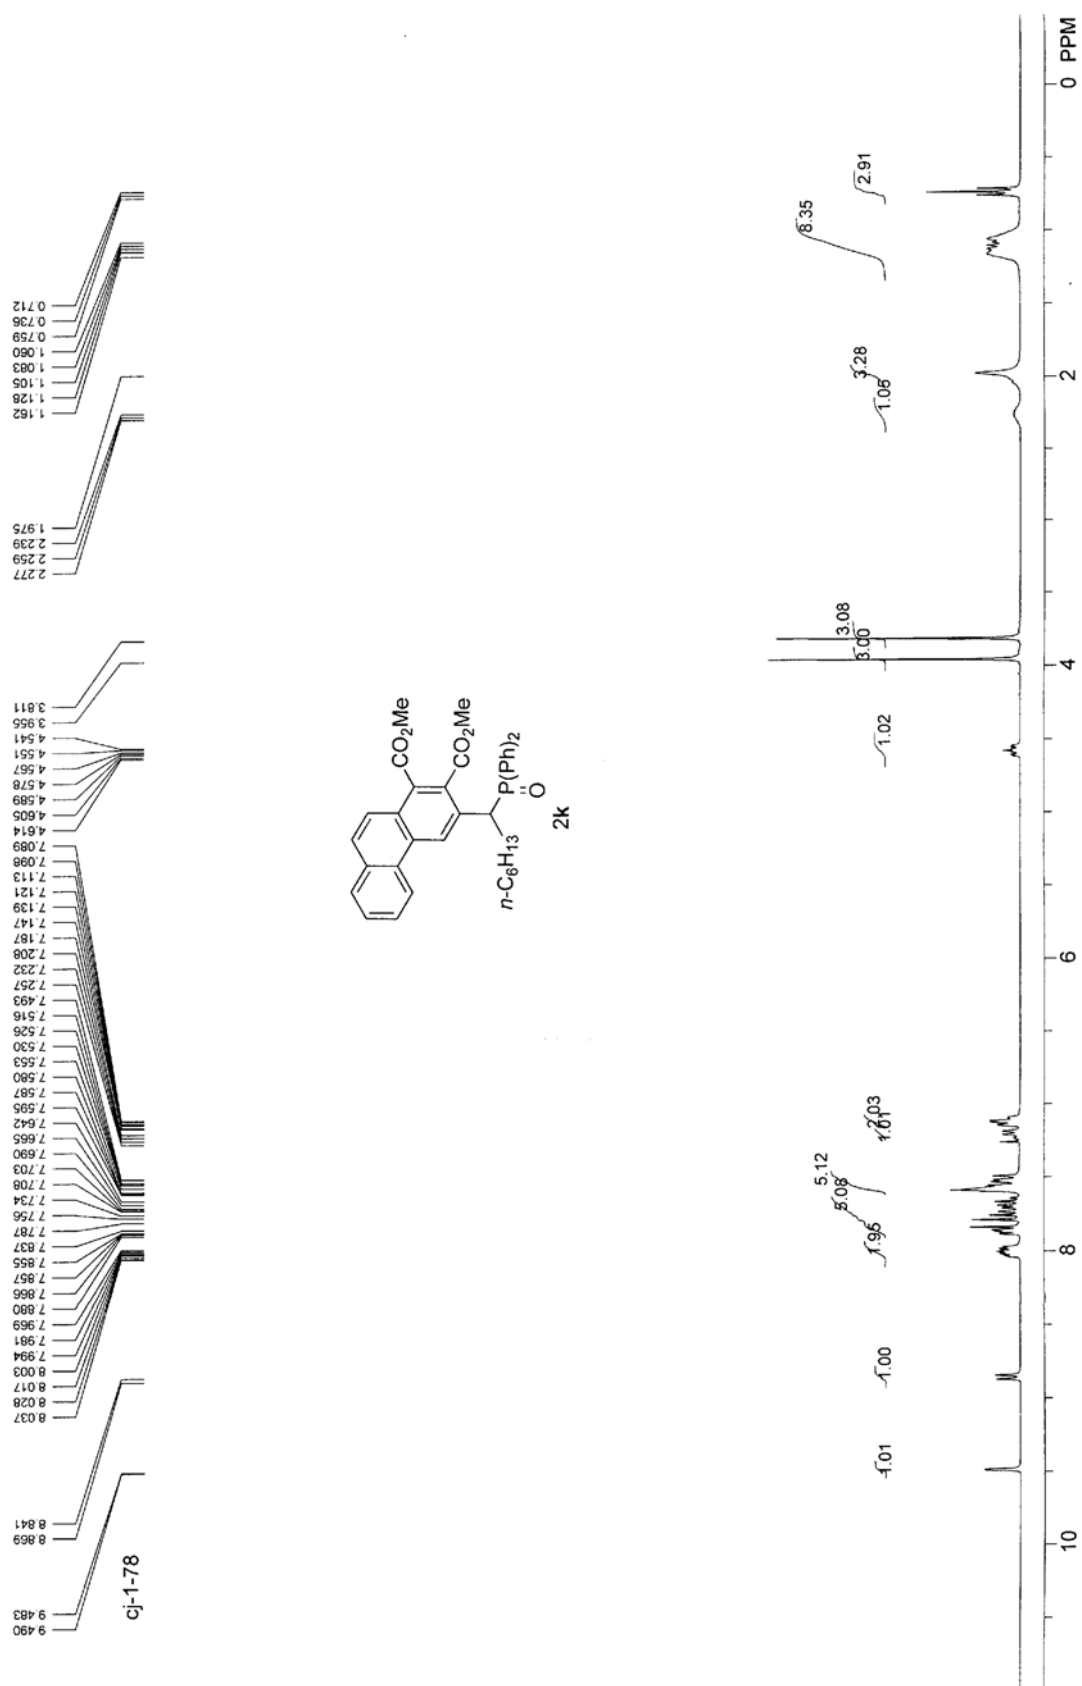



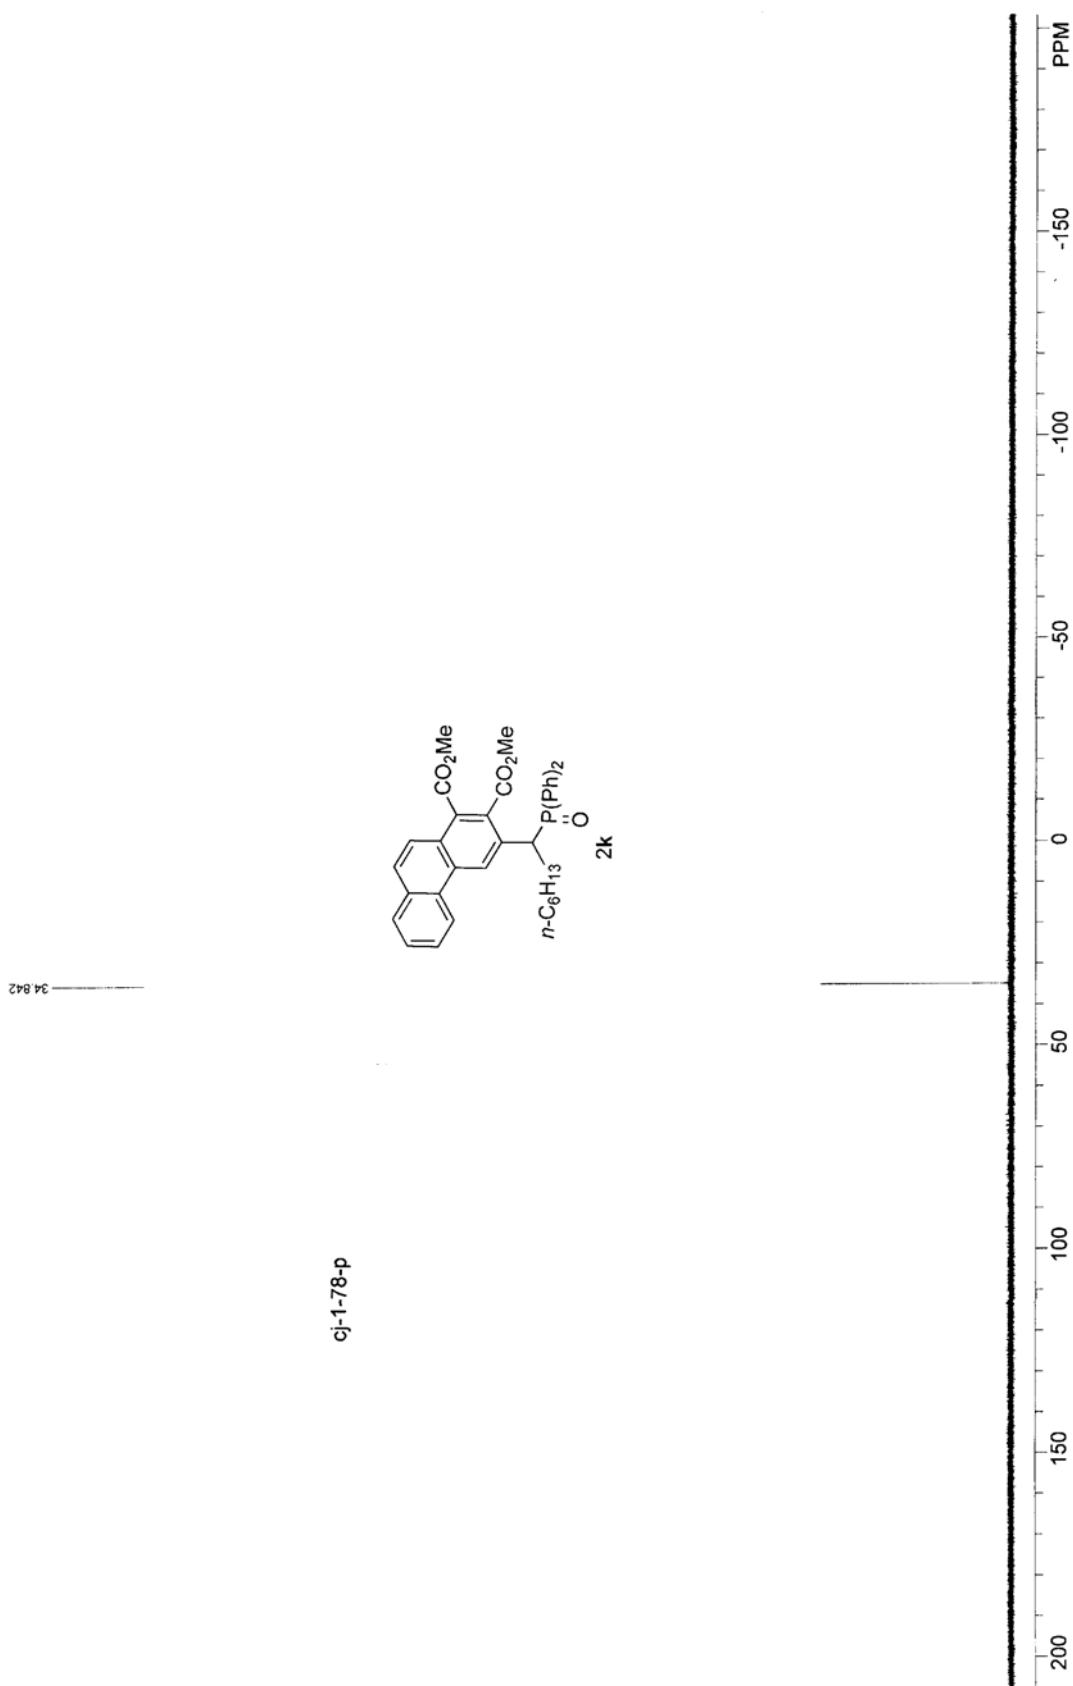

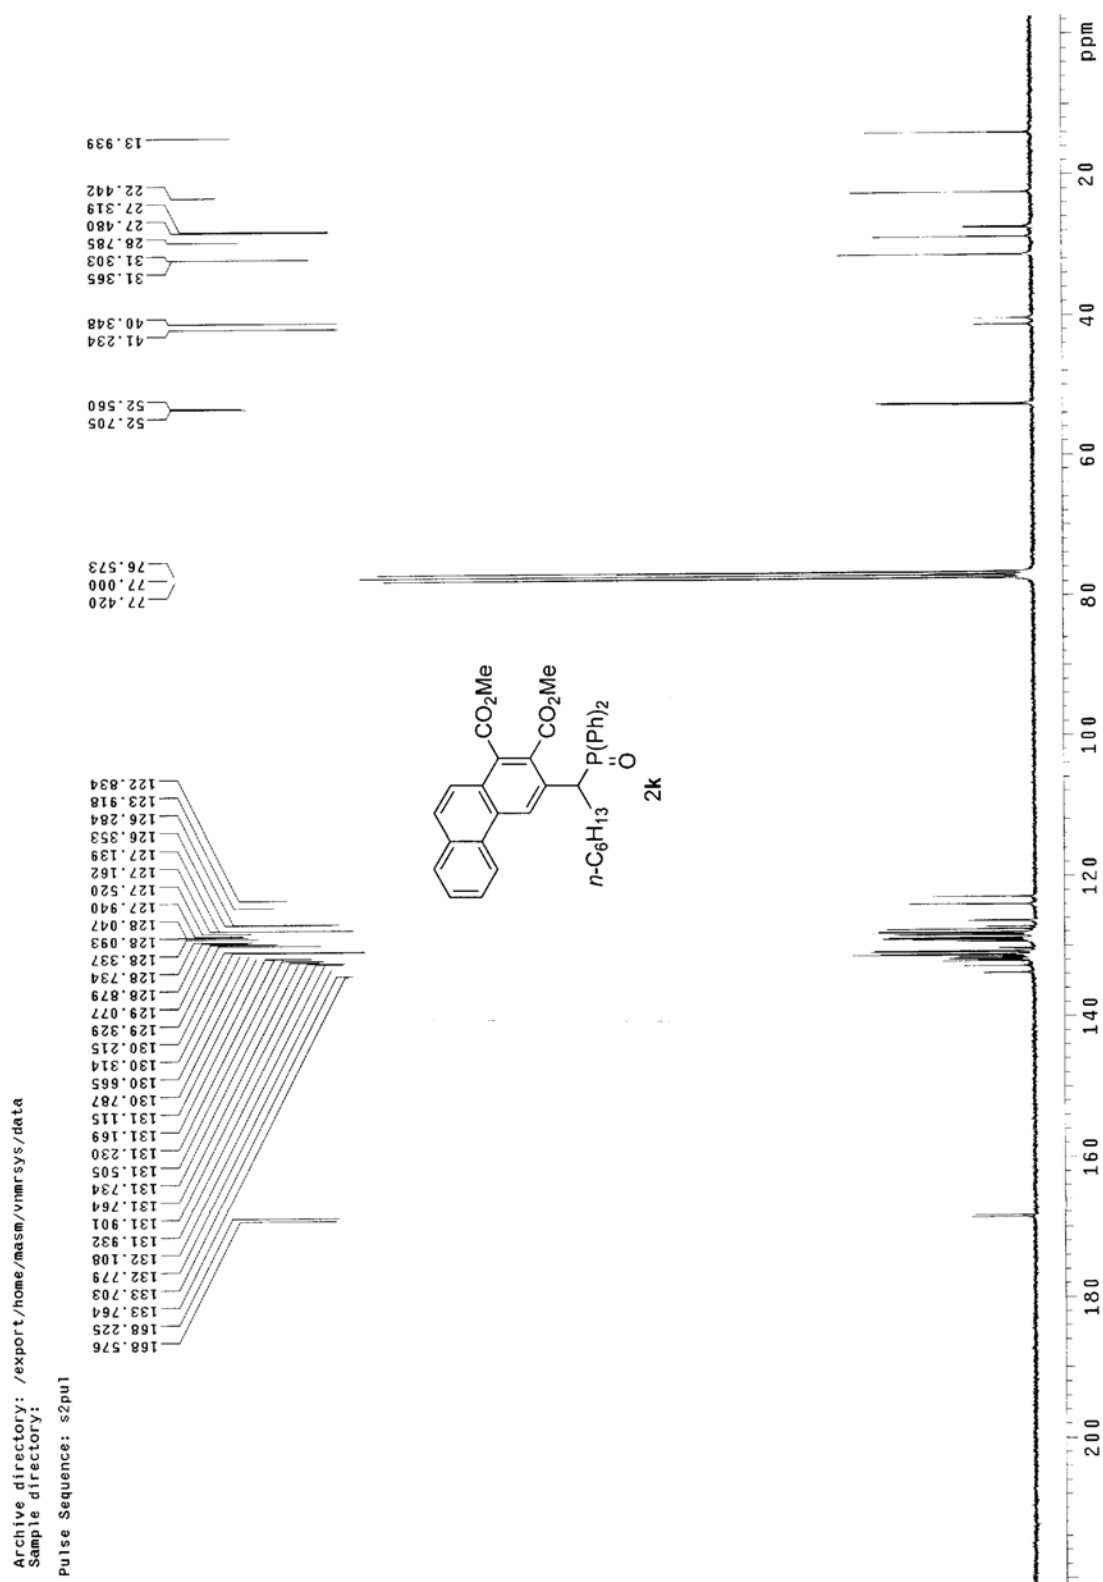

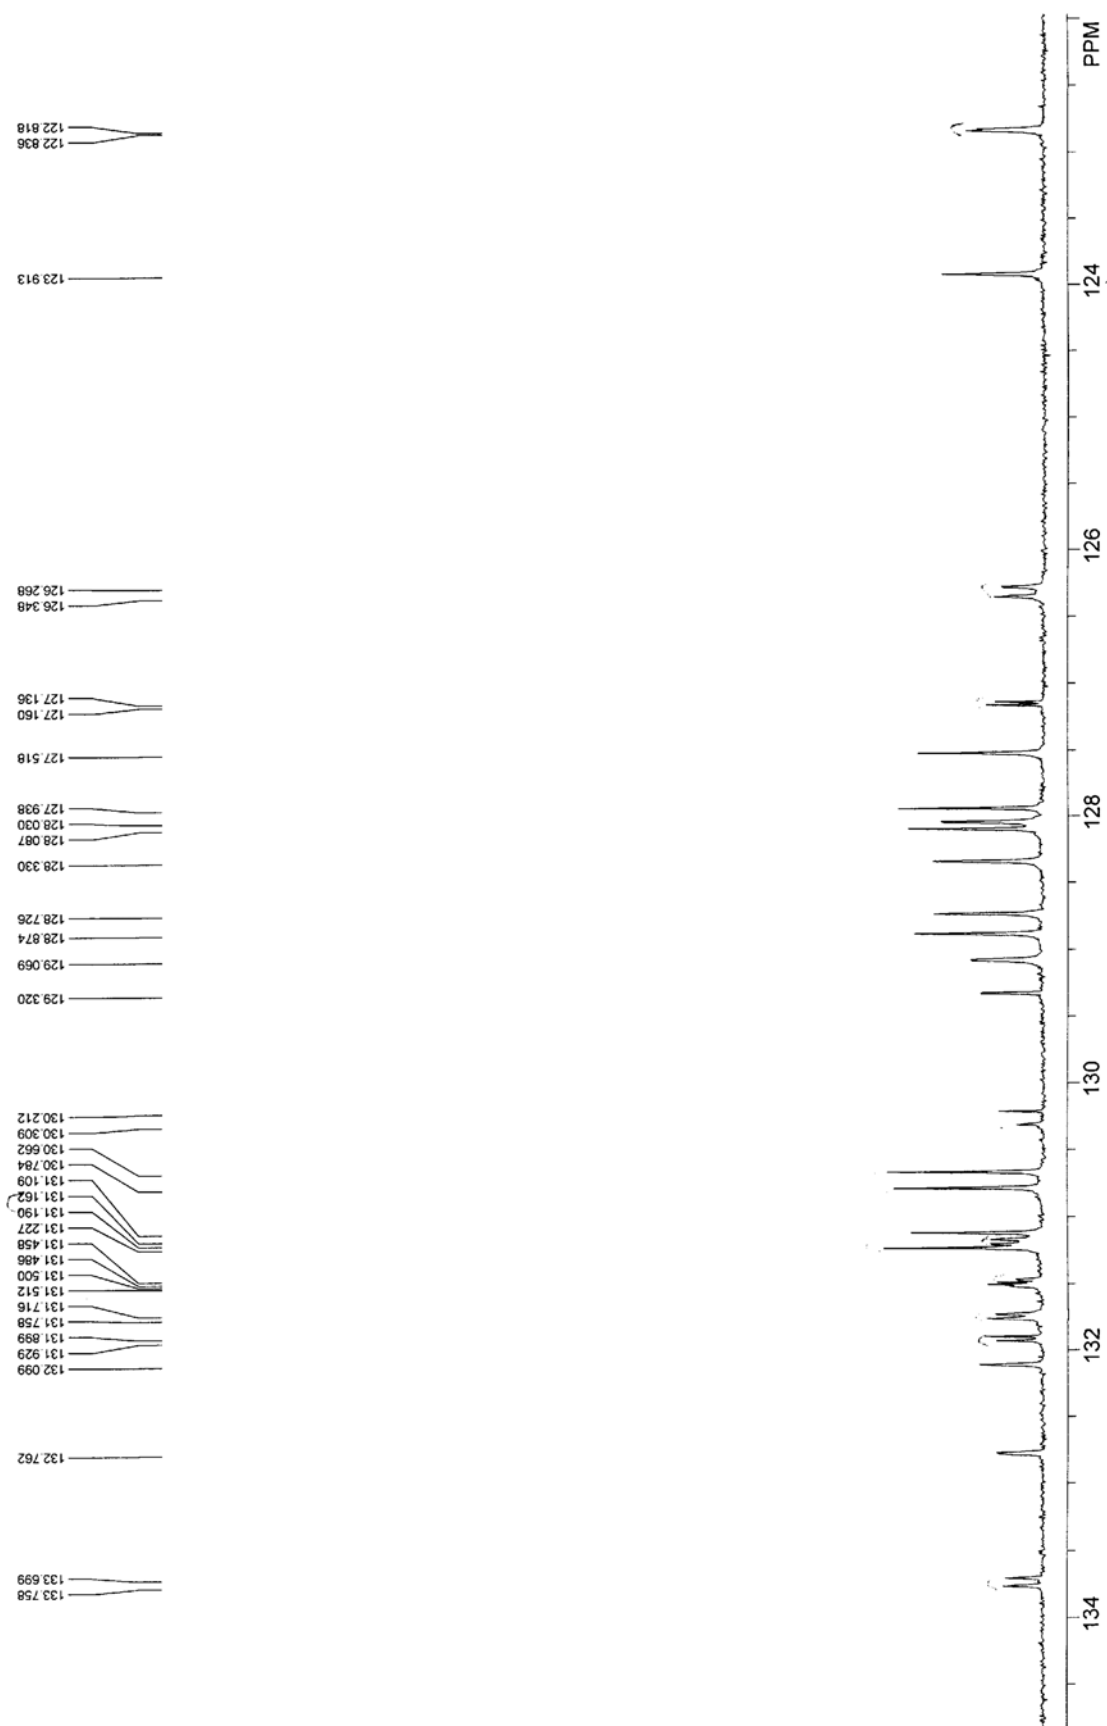

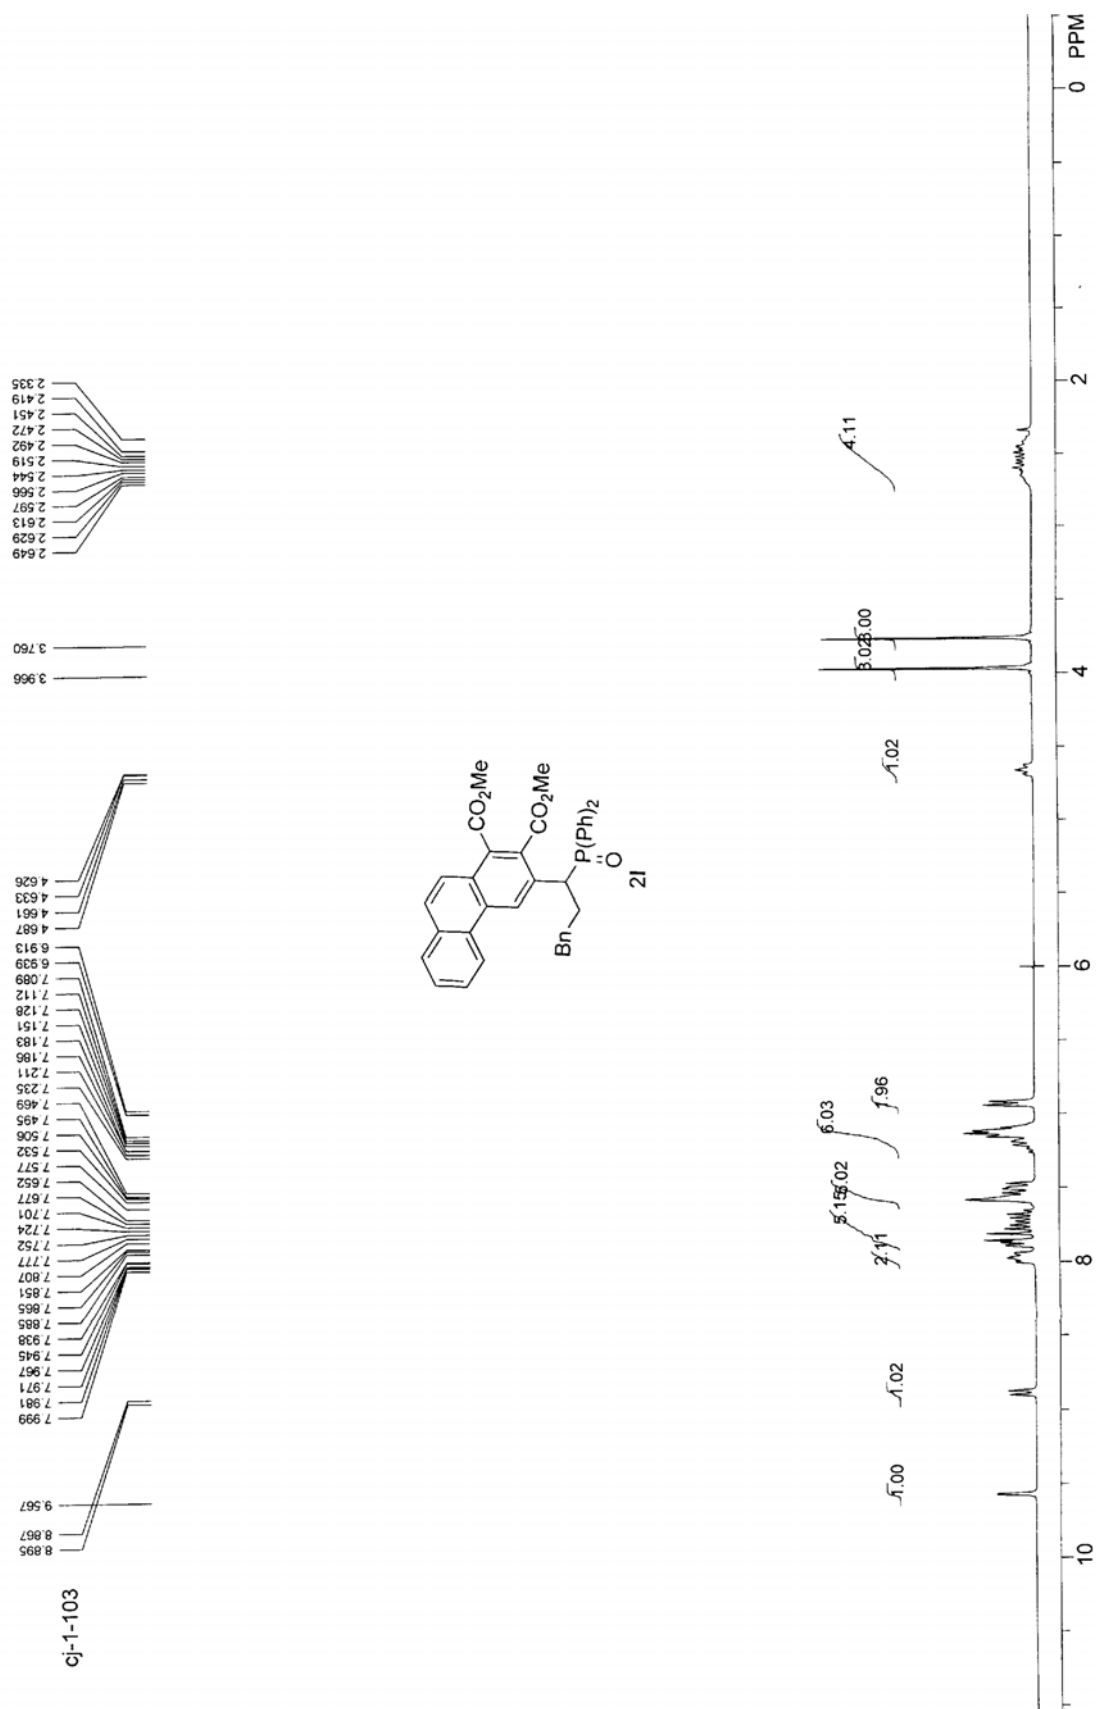

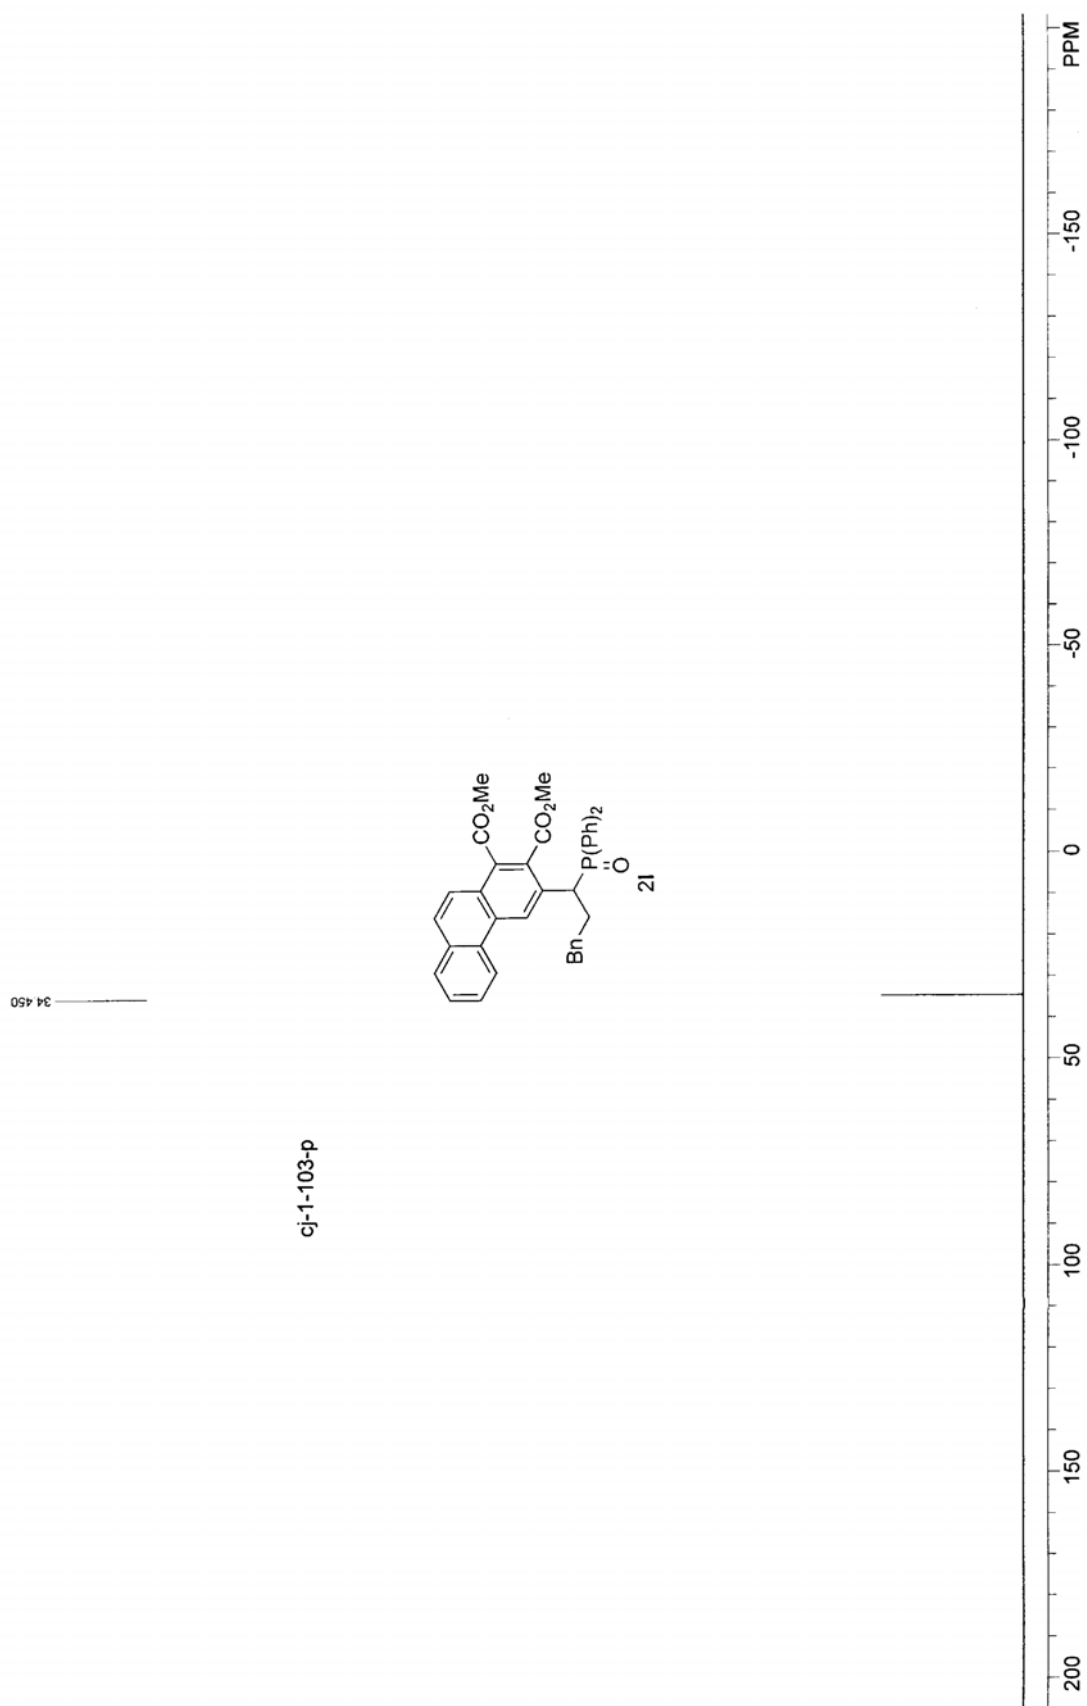

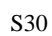

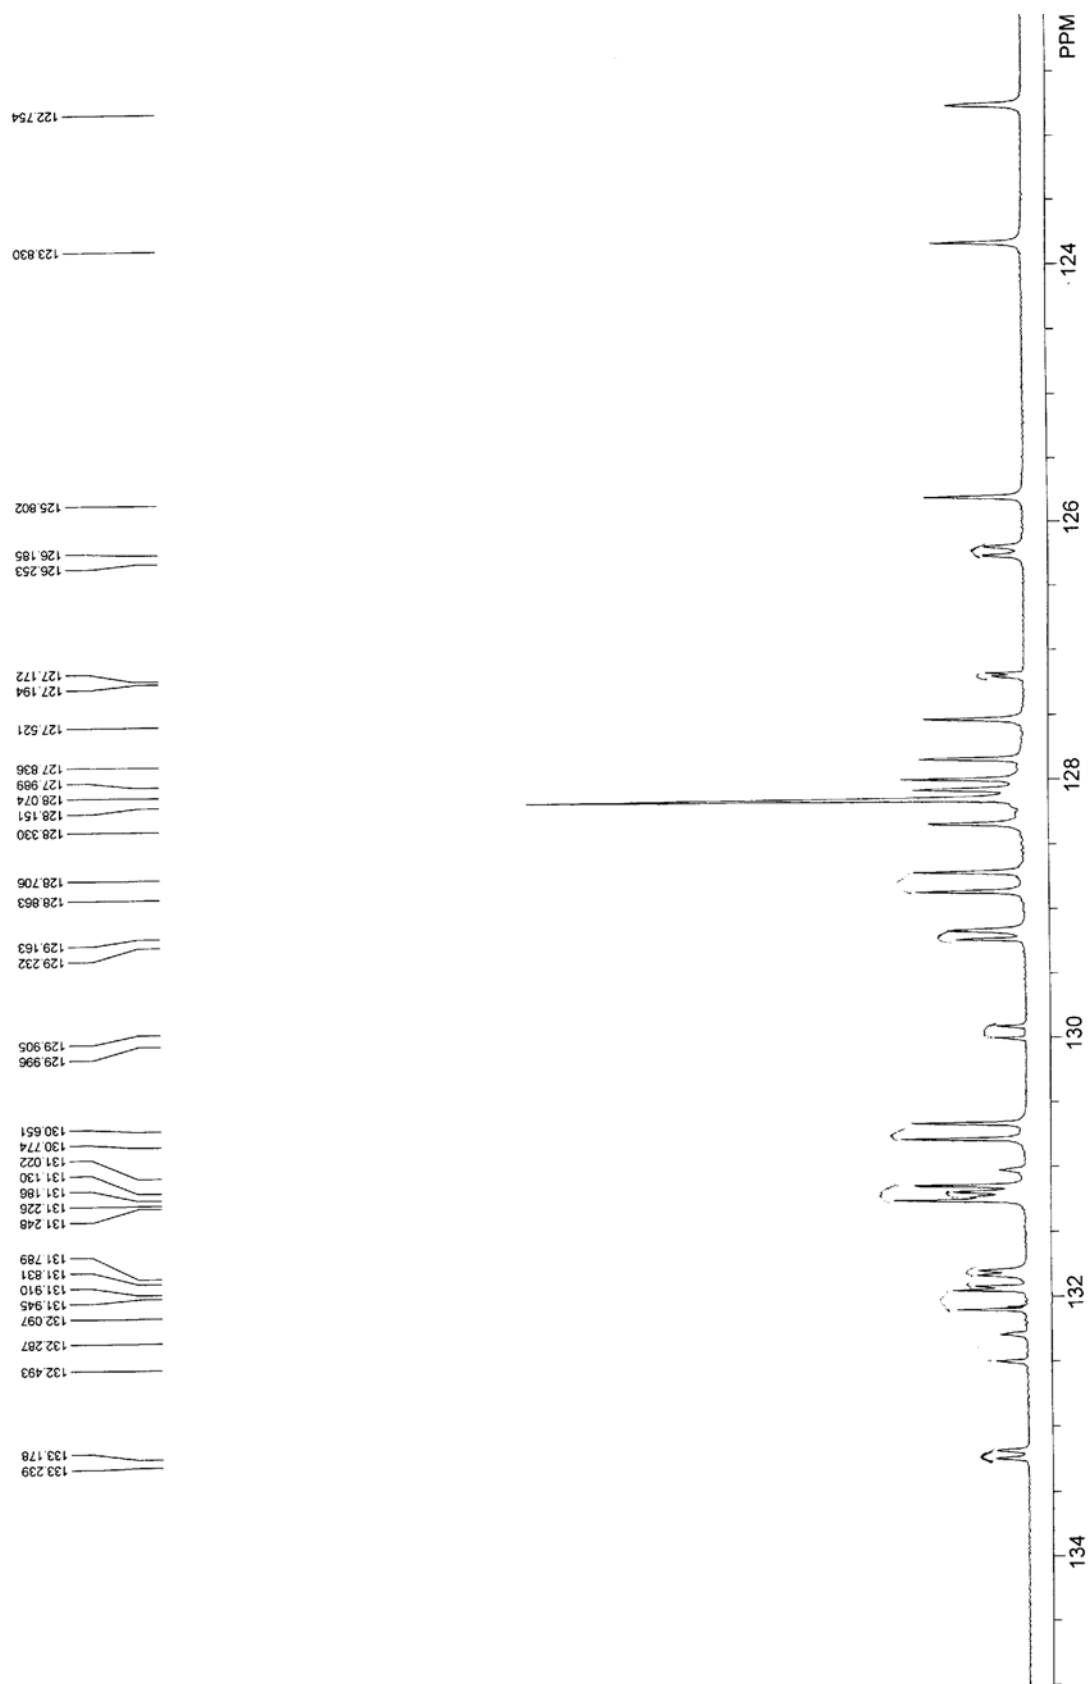

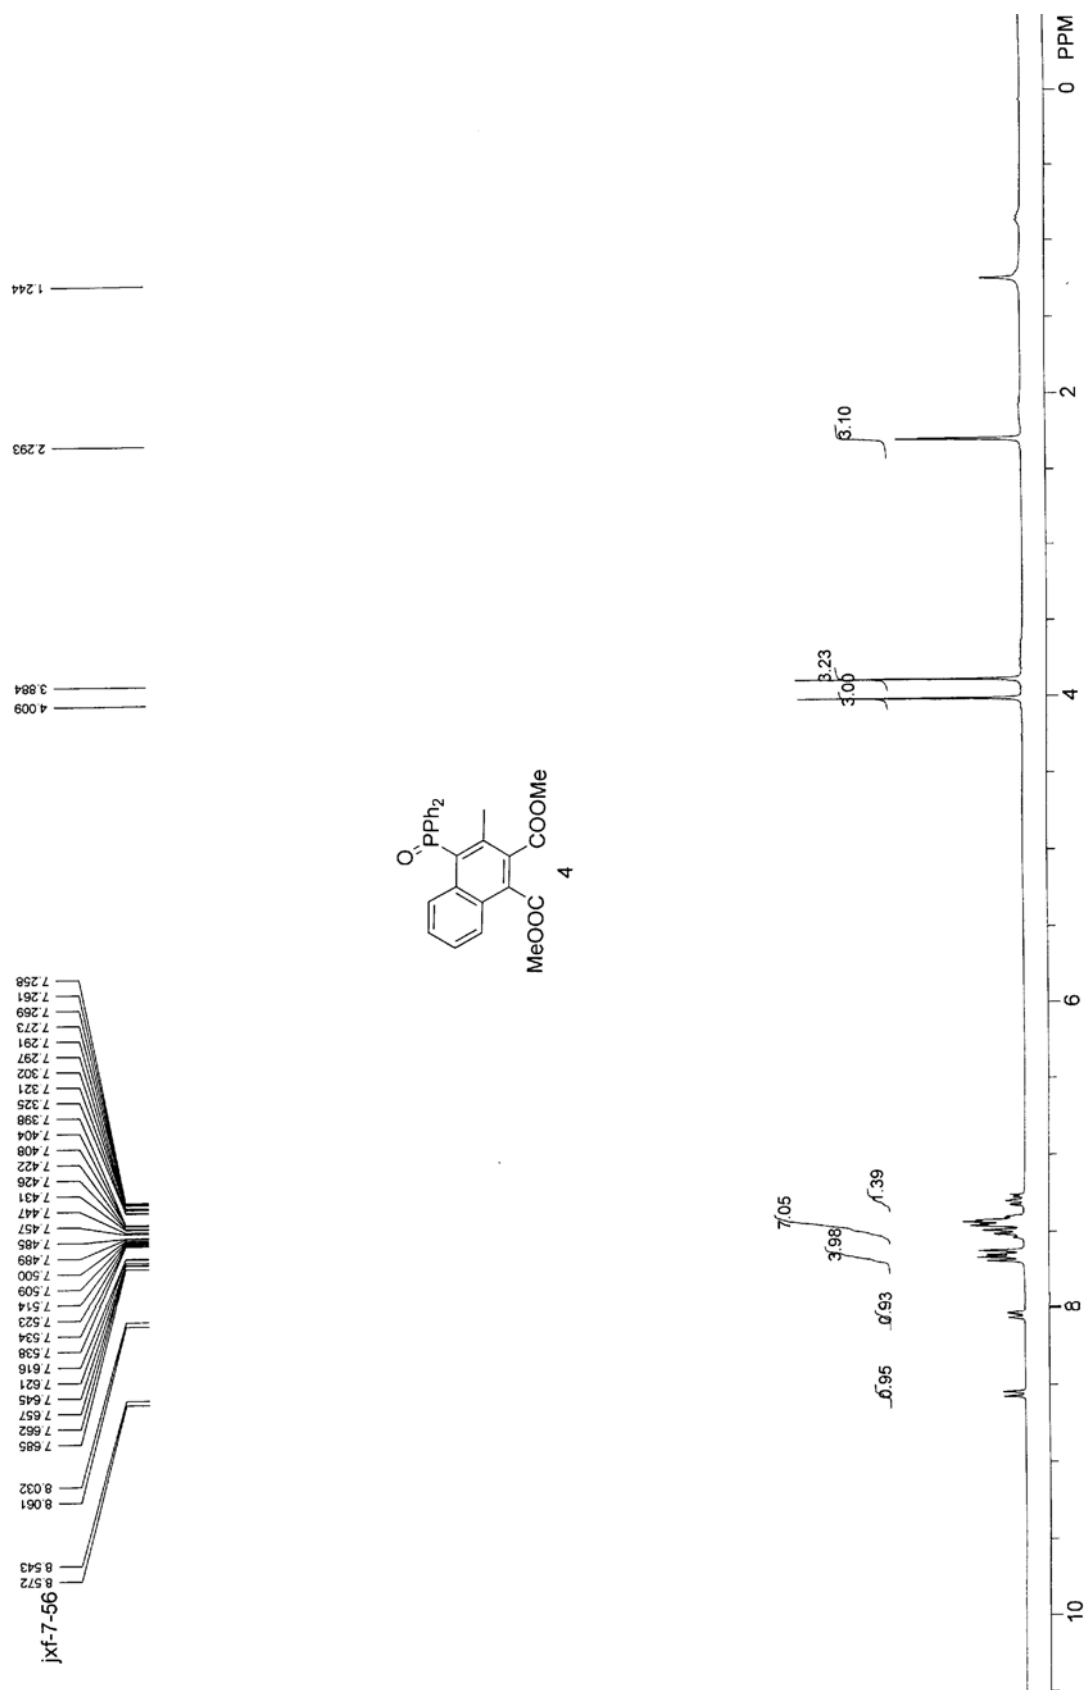



jxf-7-56-pp  
Archive directory: /export/home/masm/vnmrSYS/data  
Sample directory:  
File: PHOSPHORUS  
Pulse Sequence: s2pu1

31.916

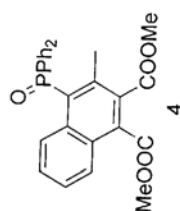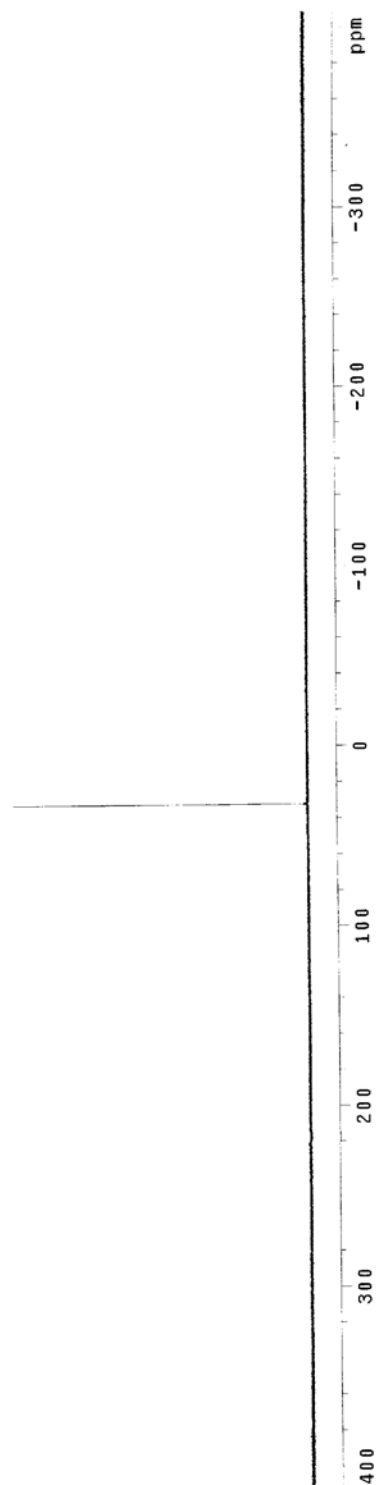

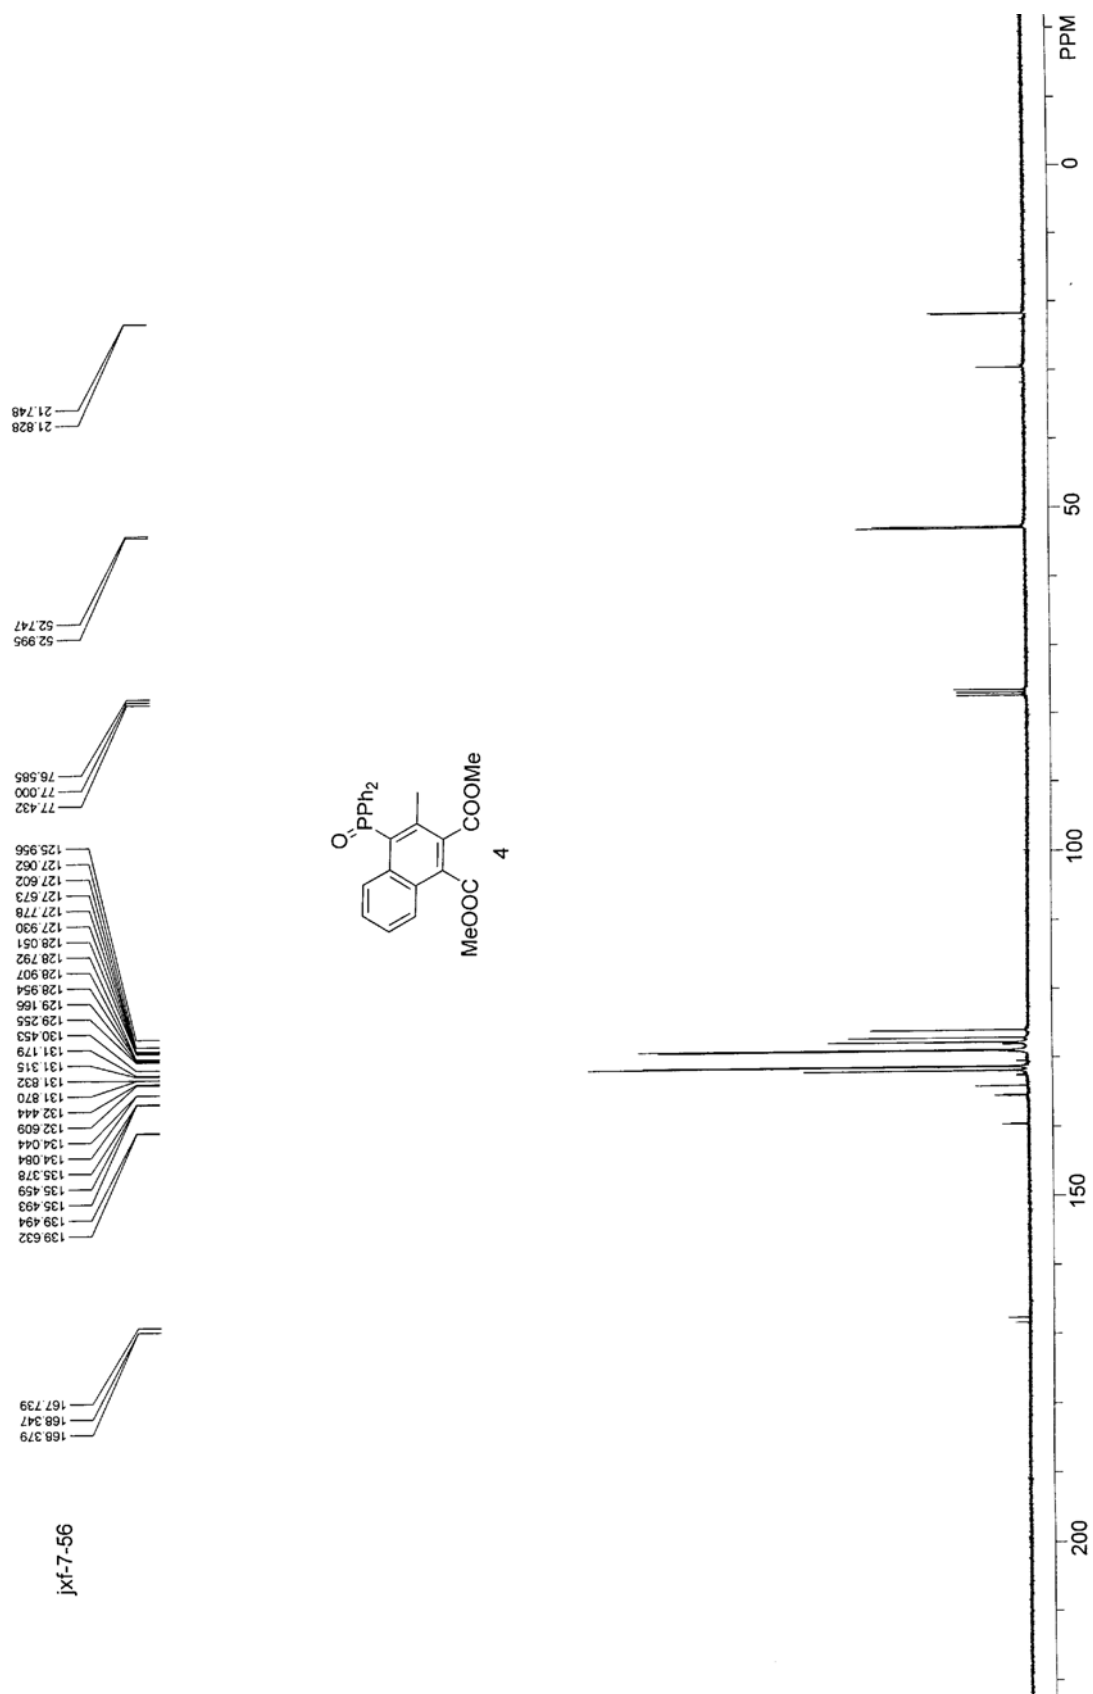

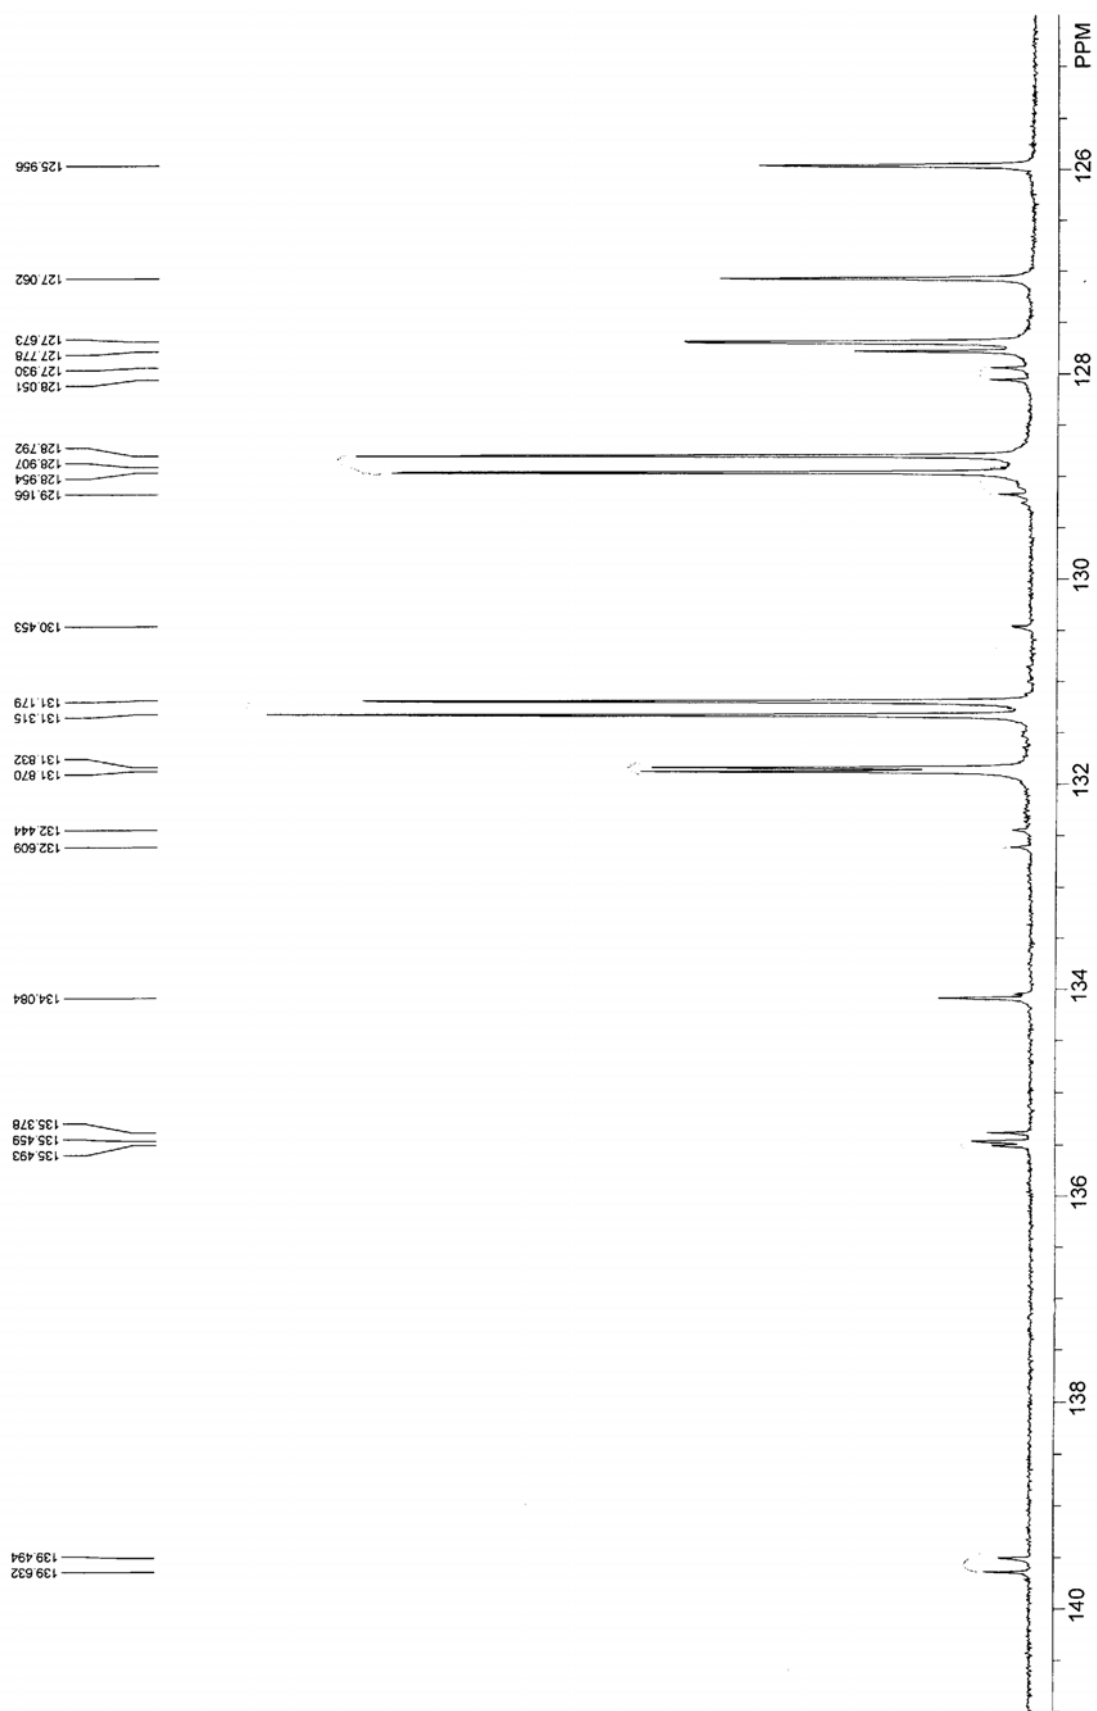

Supplement: b808767a.pdf [file b808767a.pdf]
